# Supplementary material
Source: publisher figshare collection journal article supplement (https://rs.figshare.com/ndownloader/files/17842484)
Supplement: Supplementary file 1 [file 17842484]

50	0.01	0.99	-1	1	0.03	0.04	0.04	0.9	10	1	65.058	0
50	0.01	0.99	-1	1	0.03	0.04	0.04	0.8	10	1	70.125	0
50	0.01	0.99	-1	1	0.03	0.04	0.04	0.6	10	1	80.913	0
50	0.01	0.99	-1	1	0.03	0.04	0.04	0.7	10	1	75.312	0
50	0.3	0.99	-1	1	0.03	0.04	0.04	0.7	10	1	172.02	0
50	0.1	0.99	-1	1	0.03	0.04	0.04	0.4	10	1	157.65	2.00E-05
50	0.1	0.99	-1	1	0.03	0.04	0.04	0.9	10	1	100.56	0
50	0.01	0.99	-1	1	0.03	0.04	0.04	0.5	10	1	90.024	0
50	0.01	0.99	-1	1	0.03	0.04	0.04	0.4	10	1	102.72	0
50	0.1	0.99	-1	1	0.03	0.04	0.04	0.7	10	1	115.06	0
50	0.1	0.99	-1	1	0.03	0.04	0.04	0.6	10	1	124.61	0
50	0.1	0.99	-1	1	0.03	0.04	0.04	0.5	10	1	139.7	0
50	0.01	0.9	-1	1	0.03	0.04	0.2	0.9	10	1	87.442	0
50	0.01	0.9	-1	1	0.03	0.04	0.2	0.8	10	1	93.226	0
50	0.2	0.99	-1	1	0.03	0.04	0.04	0.9	10	1	125.24	0
50	0.1	0.9	-1	1	0.03	0.04	0.2	0.9	10	1	108.85	0
50	0.1	0.99	-1	1	0.03	0.04	0.04	0.8	10	1	107.05	0
50	0.2	0.99	-1	1	0.03	0.04	0.04	0.8	10	1	133.98	0
50	0.3	0.99	-1	1	0.03	0.04	0.04	0.9	10	1	152.08	0
50	0.1	0.9	-1	1	0.03	0.04	0.2	0.8	10	1	117.39	0
50	0.2	0.99	-1	1	0.03	0.04	0.04	0.7	10	1	142.59	0
50	0.2	0.99	-1	1	0.03	0.04	0.04	0.3	10	1	234.67	0.00086
50	0.2	0.7	-1	1	0.03	0.04	0.2	0.5	10	1	175	4.00E-05
50	0.2	0.99	-1	1	0.03	0.04	0.04	0.6	10	1	156.43	0
50	0.3	0.99	-1	1	0.03	0.04	0.04	0.8	10	1	160.1	0
50	0.99	0.4	-1	1	0.03	0.04	1.2	0.7	10	1	179.96	1.00E-05
50	0.2	0.9	-1	1	0.03	0.04	0.2	0.9	10	1	127.91	0
50	0.3	0.99	-1	1	0.03	0.04	0.04	0.6	10	1	186.88	0
50	0.99	0.2	-1	1	0.03	0.04	2	0.2	10	1	132.29	0
50	0.2	0.99	-1	1	0.03	0.04	0.04	0.5	10	1	172.34	0
50	0.4	0.99	-1	1	0.03	0.04	0.04	0.8	10	1	196.88	0
50	0.01	0.99	-1	1	0.03	0.04	0.04	0.3	10	1	121.02	0
50	0.4	0.99	-1	1	0.03	0.04	0.04	0.9	10	1	185.43	0
50	0.6	0.9	-1	1	0.03	0.04	0.2	0.8	10	1	282.78	0
50	0.01	0.8	-1	1	0.03	0.04	0.2	0.7	10	1	108.88	0
50	0.2	0.9	-1	1	0.03	0.04	0.2	0.8	10	1	135.86	0
50	0.01	0.8	-1	1	0.03	0.04	0.2	0.6	10	1	117.41	0
50	0.3	0.99	-1	1	0.03	0.04	0.04	0.5	10	1	210.74	0
50	0.7	0.4	-1	1	0.03	0.04	0.8	0.5	10	1	187.29	4.00E-05
50	0.3	0.9	-1	1	0.03	0.04	0.2	0.9	10	1	148.03	0
50	0.7	0.3	-1	1	0.03	0.04	1.2	0.4	10	1	162.09	1.00E-05
50	0.01	0.99	-1	1	0.03	0.04	0.04	0.2	10	1	155.89	0.00063
50	0.4	0.99	-1	1	0.03	0.04	0.04	0.7	10	1	210.75	0
50	0.7	0.4	-1	1	0.03	0.04	1.2	0.7	10	1	166.87	1.00E-05
50	0.3	0.9	-1	1	0.03	0.04	0.2	0.8	10	1	157.14	0
50	0.99	0.3	-1	1	0.03	0.04	0.8	0.4	10	1	183.02	0.0001
50	0.1	0.8	-1	1	0.03	0.04	0.2	0.7	10	1	130.75	0
50	0.5	0.99	-1	1	0.03	0.04	0.04	0.9	10	1	234.38	0
50	0.4	0.9	-1	1	0.03	0.04	0.2	0.9	10	1	174.68	0
50	0.1	0.8	-1	1	0.03	0.04	0.2	0.6	10	1	140.45	0
50	0.2	0.99	-1	1	0.03	0.04	0.04	0.4	10	1	195.38	8.00E-05
50	0.3	0.4	-1	1	0.03	0.04	1.2	0.8	10	1	147.09	0
50	0.2	0.3	-1	1	0.03	0.04	2	0.9	10	1	136.47	0
50	0.4	0.99	-1	1	0.03	0.04	0.04	0.6	10	1	233.02	1.00E-05
50	0.5	0.99	-1	1	0.03	0.04	0.04	0.7	10	1	267.71	0
50	0.2	0.8	-1	1	0.03	0.04	0.2	0.7	10	1	146.21	0
50	0.9	0.3	-1	1	0.03	0.04	1.6	0.4	10	1	150.96	1.00E-05
50	0.4	0.2	-1	1	0.03	0.04	0.8	0.1	10	1	185.5	0.00049
50	0.5	0.1	-1	1	0.03	0.04	1.6	0	10	1	153.5	2.00E-05
50	0.1	0.99	-1	1	0.03	0.04	0.04	0.3	10	1	187.24	0.00034
50	0.99	0.3	-1	1	0.03	0.04	1.6	0.4	10	1	148.81	0
50	0.3	0.8	-1	1	0.03	0.04	0.2	0.7	10	1	168.94	0
50	0.01	0.7	-1	1	0.03	0.04	0.2	0.5	10	1	137.61	0
50	0.5	0.99	-1	1	0.03	0.04	0.04	0.8	10	1	249.06	0
50	0.01	0.4	-1	1	0.03	0.04	1.2	0.8	10	1	136.57	0
50	0.5	0.99	-1	1	0.03	0.04	0.04	0.6	10	1	291.5	2.00E-05
50	0.4	0.1	-1	1	0.03	0.04	2	0	10	1	149.6	4.00E-05
50	0.01	0.5	-1	1	0.03	0.04	0.8	0.9	10	1	125.97	0
50	0.9	0.2	-1	1	0.03	0.04	1.6	0.3	10	1	141.46	0
50	0.2	0.8	-1	1	0.03	0.04	0.2	0.6	10	1	158.1	0
50	0.4	0.9	-1	1	0.03	0.04	0.2	0.8	10	1	184.65	0
50	0.3	0.2	-1	1	0.03	0.04	0.8	0.2	10	1	184.11	0.0004
50	0.6	0.4	-1	1	0.03	0.04	1.2	0.8	10	1	160.28	0
50	0.1	0.7	-1	1	0.03	0.04	0.2	0.5	10	1	158.17	3.00E-05
50	0.4	0.99	-1	1	0.03	0.04	0.04	0.5	10	1	255.58	3.00E-05
50	0.01	0.5	-1	1	0.03	0.04	0.8	0.8	10	1	130.82	0
50	0.5	0.9	-1	1	0.03	0.04	0.2	0.9	10	1	211.98	0
50	0.1	0.5	-1	1	0.03	0.04	0.8	0.8	10	1	137.57	0
50	0.2	0.4	-1	1	0.03	0.04	1.2	0.8	10	1	143.64	0
50	0.99	0.2	-1	1	0.03	0.04	2	0.1	10	1	130.86	0
50	0.3	0.8	-1	1	0.03	0.04	0.2	0.6	10	1	180.26	2.00E-05
50	0.99	0.3	-1	1	0.03	0.04	2	0.6	10	1	142.47	0
50	0.99	0.2	-1	1	0.03	0.04	1.6	0.3	10	1	138.18	0
50	0.1	0.5	-1	1	0.03	0.04	0.8	0.9	10	1	132.94	0
50	0.5	0.9	-1	1	0.03	0.04	0.2	0.8	10	1	224.55	0
50	0.6	0.99	-1	1	0.03	0.04	0.04	0.8	10	1	326.68	0
50	0.4	0.8	-1	1	0.03	0.04	0.2	0.7	10	1	192.68	0
50	0.2	0.5	-1	1	0.03	0.04	0.8	0.9	10	1	139.2	0
50	0.01	0.4	-1	1	0.03	0.04	1.2	0.9	10	1	132.3	0
50	0.3	0.99	-1	1	0.03	0.04	0.04	0.4	10	1	236.8	0.00016
50	0.1	0.4	-1	1	0.03	0.04	1.2	0.8	10	1	138.83	0
50	0.6	0.99	-1	1	0.03	0.04	0.04	0.9	10	1	306.67	0
50	0.2	0.5	-1	1	0.03	0.04	0.8	0.8	10	1	143.76	0
50	0.1	0.4	-1	1	0.03	0.04	1.2	0.9	10	1	135.9	0
50	0.7	0.8	-1	1	0.03	0.04	0.2	0.6	10	1	369.13	0.00128
50	0.99	0.4	-1	1	0.03	0.04	1.2	0.6	10	1	178.13	0
50	0.7	0.4	-1	1	0.03	0.04	1.2	0.8	10	1	165.85	1.00E-05
50	0.5	0.99	-1	1	0.03	0.04	0.04	0.3	10	1	434.56	0.00524
50	0.2	0.4	-1	1	0.03	0.04	1.2	0.9	10	1	139.74	0
50	0.4	0.2	-1	1	0.03	0.04	0.8	0.2	10	1	182.91	0.00031
50	0.3	0.7	-1	1	0.03	0.04	0.2	0.5	10	1	197.4	8.00E-05
50	0.5	0.3	-1	1	0.03	0.04	2	0.9	10	1	140.45	1.00E-05
50	0.1	0.3	-1	1	0.03	0.04	1.6	0.4	10	1	155.39	0
50	0.3	0.5	-1	1	0.03	0.04	0.8	0.8	10	1	152.63	0
50	0.3	0.4	-1	1	0.03	0.04	1.2	0.9	10	1	143.21	0
50	0.99	0.3	-1	1	0.03	0.04	0.8	0.3	10	1	180.67	4.00E-05
50	0.01	0.4	-1	1	0.03	0.04	1.2	0.7	10	1	143.05	0
50	0.3	0.5	-1	1	0.03	0.04	0.8	0.9	10	1	147.08	0
50	0.1	0.4	-1	1	0.03	0.04	1.6	0.8	10	1	138.53	0
50	0.4	0.5	-1	1	0.03	0.04	0.8	0.9	10	1	154.57	0
50	0.3	0.4	-1	1	0.03	0.04	1.2	0.7	10	1	149.95	0
50	0.4	0.4	-1	1	0.03	0.04	1.2	0.7	10	1	154.27	0
50	0.99	0.3	-1	1	0.03	0.04	1.6	0.5	10	1	149.59	0
50	0.2	0.4	-1	1	0.03	0.04	1.2	0.6	10	1	151.59	0
50	0.01	0.4	-1	1	0.03	0.04	1.6	0.8	10	1	140.26	0
50	0.01	0.4	-1	1	0.03	0.04	1.6	0.9	10	1	133.55	0
50	0.1	0.4	-1	1	0.03	0.04	1.6	0.9	10	1	135.17	0
50	0.2	0.4	-1	1	0.03	0.04	1.6	0.9	10	1	137.72	0
50	0.6	0.9	-1	1	0.03	0.04	0.2	0.9	10	1	267.12	0
50	0.2	0.4	-1	1	0.03	0.04	1.2	0.7	10	1	146.92	0
50	0.6	0.99	-1	1	0.03	0.04	0.04	0.7	10	1	352.18	1.00E-05
50	0.1	0.4	-1	1	0.03	0.04	1.2	0.7	10	1	142.9	0
50	0.01	0.4	-1	1	0.03	0.04	0.8	0.7	10	1	141.37	0
50	0.99	0.2	-1	1	0.03	0.04	2	0.4	10	1	134.6	0
50	0.01	0.3	-1	1	0.03	0.04	1.6	0.4	10	1	162.19	0
50	0.3	0.4	-1	1	0.03	0.04	1.2	0.6	10	1	154.55	0
50	0.4	0.3	-1	1	0.03	0.04	2	0.9	10	1	140.42	0
50	0.4	0.4	-1	1	0.03	0.04	1.2	0.8	10	1	151.58	0
50	0.3	0.3	-1	1	0.03	0.04	2	0.9	10	1	138.68	0
50	0.8	0.3	-1	1	0.03	0.04	1.6	0.4	10	1	149.97	0
50	0.6	0.4	-1	1	0.03	0.04	1.2	0.9	10	1	159.01	0
50	0.5	0.8	-1	1	0.03	0.04	0.2	0.7	10	1	228.45	0
50	0.4	0.99	-1	1	0.03	0.04	0.04	0.4	10	1	296.52	0.00054
50	0.5	0.4	-1	1	0.03	0.04	1.2	0.8	10	1	155.37	0
50	0.2	0.4	-1	1	0.03	0.04	1.6	0.8	10	1	141.01	0
50	0.99	0.2	-1	1	0.03	0.04	2	0.3	10	1	132.9	0
50	0.01	0.2	-1	1	0.03	0.04	1.6	0.3	10	1	167.9	2.00E-05
50	0.7	0.4	-1	1	0.03	0.04	1.6	0.9	10	1	155.58	0
50	0.3	0.4	-1	1	0.03	0.04	1.6	0.8	10	1	142.86	0
50	0.4	0.5	-1	1	0.03	0.04	0.8	0.8	10	1	160.44	1.00E-05
50	0.8	0.4	-1	1	0.03	0.04	1.2	0.6	10	1	171.28	1.00E-05
50	0.4	0.4	-1	1	0.03	0.04	1.2	0.6	10	1	158.43	0
50	0.7	0.4	-1	1	0.03	0.04	1.2	0.9	10	1	164.65	1.00E-05
50	0.1	0.4	-1	1	0.03	0.04	1.2	0.6	10	1	147.55	0
50	0.2	0.4	-1	1	0.03	0.04	0.8	0.7	10	1	151.31	0
50	0.3	0.4	-1	1	0.03	0.04	1.6	0.9	10	1	141.47	0
50	0.99	0.3	-1	1	0.03	0.04	2	0.9	10	1	144.04	0
50	0.1	0.4	-1	1	0.03	0.04	0.8	0.7	10	1	147.45	0
50	0.3	0.4	-1	1	0.03	0.04	0.8	0.7	10	1	156.4	0
50	0.4	0.4	-1	1	0.03	0.04	1.6	0.9	10	1	143.91	0
50	0.6	0.8	-1	1	0.03	0.04	0.2	0.6	10	1	293.35	0.00028
50	0.9	0.3	-1	1	0.03	0.04	2	0.7	10	1	142.83	0
50	0.5	0.4	-1	1	0.03	0.04	1.2	0.9	10	1	153.77	0
50	0.9	0.2	-1	1	0.03	0.04	2	0.3	10	1	134.46	0
50	0.8	0.4	-1	1	0.03	0.04	1.6	0.9	10	1	158.56	0
50	0.4	0.4	-1	1	0.03	0.04	1.6	0.8	10	1	146.85	0
50	0.4	0.8	-1	1	0.03	0.04	0.2	0.6	10	1	208.59	3.00E-05
50	0.4	0.4	-1	1	0.03	0.04	1.2	0.9	10	1	149.65	1.00E-05
50	0.9	0.4	-1	1	0.03	0.04	1.2	0.6	10	1	175.01	0
50	0.01	0.4	-1	1	0.03	0.04	0.8	0.6	10	1	147.91	0
50	0.5	0.5	-1	1	0.03	0.04	0.8	0.8	10	1	168.92	1.00E-05
50	0.01	0.4	-1	1	0.03	0.04	1.2	0.6	10	1	149.45	0
50	0.1	0.4	-1	1	0.03	0.04	0.8	0.6	10	1	151.89	1.00E-05
50	0.8	0.3	-1	1	0.03	0.04	2	0.7	10	1	144.36	0
50	0.99	0.2	-1	1	0.03	0.04	1.6	0.2	10	1	138.58	0
50	0.5	0.4	-1	1	0.03	0.04	1.2	0.6	10	1	159.92	0
50	0.2	0.4	-1	1	0.03	0.04	0.8	0.6	10	1	158.3	0
50	0.7	0.3	-1	1	0.03	0.04	2	0.9	10	1	142.77	0
50	0.6	0.3	-1	1	0.03	0.04	2	0.9	10	1	141.43	1.00E-05
50	0.4	0.4	-1	1	0.03	0.04	0.8	0.7	10	1	161.95	2.00E-05
50	0.3	0.3	-1	1	0.03	0.04	2	0.8	10	1	141.11	0
50	0.7	0.3	-1	1	0.03	0.04	1.6	0.5	10	1	151.45	0
50	0.4	0.3	-1	1	0.03	0.04	2	0.8	10	1	140.67	0
50	0.2	0.3	-1	1	0.03	0.04	2	0.8	10	1	139.75	0
50	0.9	0.3	-1	1	0.03	0.04	2	0.9	10	1	144.95	0
50	0.5	0.3	-1	1	0.03	0.04	0.8	0.4	10	1	177.81	0.00016
50	0.8	0.4	-1	1	0.03	0.04	1.2	0.7	10	1	170.28	0
50	0.1	0.3	-1	1	0.03	0.04	2	0.8	10	1	139.07	0
50	0.7	0.3	-1	1	0.03	0.04	2	0.7	10	1	143.88	0
50	0.8	0.3	-1	1	0.03	0.04	2	0.9	10	1	144.41	0
50	0.9	0.2	-1	1	0.03	0.04	2	0.4	10	1	134.66	0
50	0.9	0.4	-1	1	0.03	0.04	1.2	0.7	10	1	175.25	1.00E-05
50	0.5	0.4	-1	1	0.03	0.04	1.6	0.9	10	1	147.88	0
50	0.5	0.5	-1	1	0.03	0.04	0.8	0.9	10	1	166.85	0
50	0.9	0.2	-1	1	0.03	0.04	1.6	0.2	10	1	141.1	1.00E-05
50	0.9	0.3	-1	1	0.03	0.04	1.6	0.5	10	1	150.29	0
50	0.6	0.3	-1	1	0.03	0.04	1.6	0.5	10	1	152.68	0
50	0.6	0.3	-1	1	0.03	0.04	2	0.7	10	1	142.59	0
50	0.8	0.2	-1	1	0.03	0.04	2	0.4	10	1	138.05	0
50	0.6	0.4	-1	1	0.03	0.04	1.6	0.9	10	1	151.46	0
50	0.8	0.2	-1	1	0.03	0.04	2	0.3	10	1	137.85	0
50	0.9	0.3	-1	1	0.03	0.04	1.2	0.3	10	1	161.12	2.00E-05
50	0.9	0.4	-1	1	0.03	0.04	1.2	0.9	10	1	174.22	0
50	0.5	0.4	-1	1	0.03	0.04	1.6	0.8	10	1	150.82	0
50	0.9	0.3	-1	1	0.03	0.04	2	0.6	10	1	143.76	0
50	0.3	0.4	-1	1	0.03	0.04	0.8	0.5	10	1	166.9	2.00E-05
50	0.5	0.99	-1	1	0.03	0.04	0.04	0.5	10	1	326.63	0.0002
50	0.1	0.3	-1	1	0.03	0.04	2	0.9	10	1	136.74	0
50	0.7	0.4	-1	1	0.03	0.04	1.6	0.8	10	1	156.24	0
50	0.5	0.3	-1	1	0.03	0.04	1.6	0.4	10	1	152.94	1.00E-05
50	0.5	0.4	-1	1	0.03	0.04	0.8	0.7	10	1	168.45	2.00E-05
50	0.8	0.3	-1	1	0.03	0.04	1.6	0.5	10	1	151.63	0
50	0.8	0.3	-1	1	0.03	0.04	1.6	0.7	10	1	150.23	0
50	0.99	0.2	-1	1	0.03	0.04	1.6	0.1	10	1	137.4	0
50	0.01	0.3	-1	1	0.03	0.04	2	0.9	10	1	138.23	0
50	0.8	0.3	-1	1	0.03	0.04	2	0.6	10	1	144.23	0
50	0.6	0.4	-1	1	0.03	0.04	1.6	0.8	10	1	154.57	0
50	0.8	0.3	-1	1	0.03	0.04	1.2	0.3	10	1	161.49	1.00E-05
50	0.8	0.4	-1	1	0.03	0.04	1.2	0.9	10	1	169.15	1.00E-05
50	0.6	0.3	-1	1	0.03	0.04	1.6	0.6	10	1	148.14	0
50	0.3	0.3	-1	1	0.03	0.04	2	0.6	10	1	144.9	0
50	0.9	0.2	-1	1	0.03	0.04	2	0.2	10	1	134.93	0
50	0.7	0.2	-1	1	0.03	0.04	2	0.3	10	1	139.92	1.00E-05
50	0.99	0.3	-1	1	0.03	0.04	2	0.7	10	1	144.27	0
50	0.7	0.3	-1	1	0.03	0.04	1.6	0.7	10	1	150.42	1.00E-05
50	0.4	0.3	-1	1	0.03	0.04	2	0.7	10	1	142.58	0
50	0.7	0.99	-1	1	0.03	0.04	0.04	0.9	10	1	433.61	0
50	0.7	0.4	-1	1	0.03	0.04	1.2	0.6	10	1	167.45	1.00E-05
50	0.6	0.4	-1	1	0.03	0.04	1.2	0.7	10	1	162.01	1.00E-05
50	0.8	0.4	-1	1	0.03	0.04	1.6	0.8	10	1	158.3	0
50	0.6	0.4	-1	1	0.03	0.04	1.2	0.6	10	1	165.24	1.00E-05
50	0.9	0.2	-1	1	0.03	0.04	1.6	0.1	10	1	140.09	0
50	0.99	0.4	-1	1	0.03	0.04	1.2	0.8	10	1	181.33	0
50	0.5	0.4	-1	1	0.03	0.04	1.2	0.7	10	1	158.56	0
50	0.5	0.3	-1	1	0.03	0.04	2	0.7	10	1	145.02	0
50	0.9	0.4	-1	1	0.03	0.04	1.6	0.9	10	1	164.07	0
50	0.5	0.3	-1	1	0.03	0.04	1.6	0.6	10	1	149.61	0
50	0.99	0.4	-1	1	0.03	0.04	1.2	0.9	10	1	182.91	2.00E-05
50	0.99	0.2	-1	1	0.03	0.04	2	0.5	10	1	134.8	0
50	0.99	0.3	-1	1	0.03	0.04	1.6	0.7	10	1	151.08	0
50	0.01	0.4	-1	1	0.03	0.04	0.8	0.5	10	1	156.15	1.00E-05
50	0.3	0.3	-1	1	0.03	0.04	1.2	0.5	10	1	156.53	1.00E-05
50	0.6	0.5	-1	1	0.03	0.04	0.8	0.9	10	1	177.58	0
50	0.4	0.3	-1	1	0.03	0.04	1.6	0.4	10	1	153.58	1.00E-05
50	0.4	0.3	-1	1	0.03	0.04	1.2	0.5	10	1	158.15	0
50	0.7	0.2	-1	1	0.03	0.04	2	0.5	10	1	138.99	0
50	0.1	0.4	-1	1	0.03	0.04	0.8	0.5	10	1	159.46	1.00E-05
50	0.5	0.3	-1	1	0.03	0.04	2	0.8	10	1	141.24	0
50	0.7	0.3	-1	1	0.03	0.04	1.2	0.5	10	1	160.49	2.00E-05
50	0.9	0.4	-1	1	0.03	0.04	1.6	0.8	10	1	162.68	0
50	0.8	0.3	-1	1	0.03	0.04	1.2	0.5	10	1	162.05	0
50	0.99	0.4	-1	1	0.03	0.04	1.6	0.9	10	1	167.25	0
50	0.2	0.1	-1	1	0.03	0.04	0.8	0	10	1	204.25	0.00159
50	0.6	0.3	-1	1	0.03	0.04	2	0.6	10	1	144.56	0
50	0.9	0.3	-1	1	0.03	0.04	1.6	0.7	10	1	150.8	1.00E-05
50	0.9	0.2	-1	1	0.03	0.04	2	0.5	10	1	135.34	0
50	0.1	0.3	-1	1	0.03	0.04	1.6	0.6	10	1	146.69	0
50	0.6	0.99	-1	1	0.03	0.04	0.04	0.5	10	1	428.97	0.00057
50	0.6	0.3	-1	1	0.03	0.04	2	0.8	10	1	142.45	0
50	0.7	0.3	-1	1	0.03	0.04	2	0.8	10	1	143.21	0
50	0.99	0.3	-1	1	0.03	0.04	1.6	0.6	10	1	149.86	0
50	0.1	0.3	-1	1	0.03	0.04	1.2	0.5	10	1	154.55	0
50	0.8	0.4	-1	1	0.03	0.04	1.2	0.8	10	1	170.31	0
50	0.2	0.4	-1	1	0.03	0.04	0.8	0.5	10	1	162.81	3.00E-05
50	0.8	0.3	-1	1	0.03	0.04	2	0.8	10	1	143.96	0
50	0.7	0.3	-1	1	0.03	0.04	1.6	0.4	10	1	152.7	1.00E-05
50	0.7	0.3	-1	1	0.03	0.04	2	0.6	10	1	145.02	0
50	0.99	0.3	-1	1	0.03	0.04	1.2	0.5	10	1	161.36	0
50	0.5	0.8	-1	1	0.03	0.04	0.2	0.6	10	1	243.76	7.00E-05
50	0.6	0.3	-1	1	0.03	0.04	1.6	0.4	10	1	153.53	1.00E-05
50	0.9	0.3	-1	1	0.03	0.04	1.6	0.6	10	1	150.31	0
50	0.2	0.3	-1	1	0.03	0.04	2	0.6	10	1	143.83	0
50	0.5	0.4	-1	1	0.03	0.04	0.8	0.6	10	1	173.92	4.00E-05
50	0.6	0.5	-1	1	0.03	0.04	0.8	0.8	10	1	179.57	0
50	0.8	0.2	-1	1	0.03	0.04	2	0.2	10	1	137.64	0
50	0.9	0.4	-1	1	0.03	0.04	1.2	0.8	10	1	176.27	0
50	0.2	0.3	-1	1	0.03	0.04	1.2	0.5	10	1	155.92	0
50	0.3	0.4	-1	1	0.03	0.04	0.8	0.6	10	1	162.69	1.00E-05
50	0.99	0.3	-1	1	0.03	0.04	1.2	0.3	10	1	159.26	0
50	0.7	0.3	-1	1	0.03	0.04	1.2	0.3	10	1	162.33	3.00E-05
50	0.5	0.3	-1	1	0.03	0.04	1.6	0.5	10	1	151.43	0
50	0.99	0.2	-1	1	0.03	0.04	1.2	0.2	10	1	148.44	1.00E-05
50	0.4	0.3	-1	1	0.03	0.04	1.6	0.5	10	1	151.42	2.00E-05
50	0.1	0.3	-1	1	0.03	0.04	2	0.7	10	1	142.48	0
50	0.9	0.1	-1	1	0.03	0.04	2	0	10	1	129.45	0
50	0.9	0.3	-1	1	0.03	0.04	2	0.8	10	1	144.6	0
50	0.6	0.3	-1	1	0.03	0.04	1.2	0.3	10	1	164.44	1.00E-05
50	0.7	0.2	-1	1	0.03	0.04	2	0.2	10	1	140.72	0
50	0.4	0.3	-1	1	0.03	0.04	2	0.6	10	1	144.63	0
50	0.8	0.2	-1	1	0.03	0.04	2	0.5	10	1	137.58	0
50	0.9	0.3	-1	1	0.03	0.04	1.2	0.5	10	1	162.29	1.00E-05
50	0.7	0.2	-1	1	0.03	0.04	2	0.4	10	1	139.06	1.00E-05
50	0.6	0.4	-1	1	0.03	0.04	0.8	0.7	10	1	176.38	3.00E-05
50	0.7	0.3	-1	1	0.03	0.04	1.6	0.6	10	1	151.42	0
50	0.3	0.3	-1	1	0.03	0.04	1.6	0.5	10	1	150.91	0
50	0.01	0.3	-1	1	0.03	0.04	1.6	0.6	10	1	148.63	1.00E-05
50	0.5	0.2	-1	1	0.03	0.04	2	0.4	10	1	144.57	0
50	0.4	0.4	-1	1	0.03	0.04	0.8	0.6	10	1	165.95	0
50	0.01	0.6	-1	1	0.03	0.04	0.2	0.3	10	1	183.71	0.00034
50	0.1	0.3	-1	1	0.03	0.04	2	0.6	10	1	144.84	0
50	0.3	0.3	-1	1	0.03	0.04	1.6	0.7	10	1	145.77	0
50	0.5	0.2	-1	1	0.03	0.04	2	0.5	10	1	142.28	0
50	0.8	0.3	-1	1	0.03	0.04	1.6	0.6	10	1	151.95	0
50	0.6	0.99	-1	1	0.03	0.04	0.04	0.3	10	1	559.77	0.00775
50	0.4	0.3	-1	1	0.03	0.04	1.6	0.7	10	1	146.71	0
50	0.3	0.2	-1	1	0.03	0.04	2	0.5	10	1	145.84	0
50	0.1	0.3	-1	1	0.03	0.04	1.2	0.4	10	1	159.18	1.00E-05
50	0.4	0.2	-1	1	0.03	0.04	2	0.4	10	1	145.04	1.00E-05
50	0.99	0.5	-1	1	0.03	0.04	0.8	0.9	10	1	236.86	0.00035
50	0.7	0.2	-1	1	0.03	0.04	2	0.1	10	1	142.06	1.00E-05
50	0.99	0.2	-1	1	0.03	0.04	1.2	0.1	10	1	146.27	0
50	0.2	0.3	-1	1	0.03	0.04	1.6	0.6	10	1	146.54	0
50	0.99	0.1	-1	1	0.03	0.04	2	0	10	1	125.93	0
50	0.2	0.3	-1	1	0.03	0.04	1.6	0.7	10	1	143.89	0
50	0.6	0.2	-1	1	0.03	0.04	1.6	0.2	10	1	149.85	3.00E-05
50	0.1	0.3	-1	1	0.03	0.04	1.6	0.7	10	1	142.95	0
50	0.8	0.2	-1	1	0.03	0.04	2	0.1	10	1	137.86	0
50	0.5	0.3	-1	1	0.03	0.04	1.2	0.5	10	1	159.2	2.00E-05
50	0.9	0.2	-1	1	0.03	0.04	2	0.1	10	1	134.21	0
50	0.6	0.3	-1	1	0.03	0.04	1.2	0.5	10	1	159.43	1.00E-05
50	0.3	0.3	-1	1	0.03	0.04	1.6	0.4	10	1	153.34	1.00E-05
50	0.5	0.3	-1	1	0.03	0.04	1.6	0.7	10	1	147.55	1.00E-05
50	0.9	0.3	-1	1	0.03	0.04	1.2	0.4	10	1	161.13	1.00E-05
50	0.4	0.7	-1	1	0.03	0.04	0.2	0.5	10	1	221.24	0.00029
50	0.3	0.99	-1	1	0.03	0.04	0.04	0.3	10	1	286.95	0.00159
50	0.5	0.3	-1	1	0.03	0.04	2	0.6	10	1	143.68	0
50	0.2	0.3	-1	1	0.03	0.04	1.6	0.5	10	1	150.28	0
50	0.8	0.2	-1	1	0.03	0.04	1.6	0.3	10	1	143.22	2.00E-05
50	0.7	0.4	-1	1	0.03	0.04	0.8	0.7	10	1	182.38	9.00E-05
50	0.3	0.3	-1	1	0.03	0.04	1.6	0.6	10	1	147.85	0
50	0.01	0.3	-1	1	0.03	0.04	2	0.8	10	1	141.23	0
50	0.2	0.3	-1	1	0.03	0.04	1.2	0.4	10	1	161.35	4.00E-05
50	0.1	0.99	-1	1	0.03	0.04	0.04	0.2	10	1	238.92	0.00401
50	0.6	0.2	-1	1	0.03	0.04	2	0.5	10	1	141.22	0
50	0.6	0.2	-1	1	0.03	0.04	2	0.4	10	1	141.8	0
50	0.2	0.3	-1	1	0.03	0.04	1.6	0.4	10	1	154.33	0
50	0.9	0.2	-1	1	0.03	0.04	1.2	0.1	10	1	149.76	0
50	0.6	0.3	-1	1	0.03	0.04	1.6	0.7	10	1	148.72	0
50	0.6	0.2	-1	1	0.03	0.04	2	0.1	10	1	144.23	0
50	0.8	0.3	-1	1	0.03	0.04	1.2	0.4	10	1	163.12	0
50	0.99	0.1	-1	1	0.03	0.04	1.2	0	10	1	139.15	0
50	0.6	0.3	-1	1	0.03	0.04	1.2	0.4	10	1	161.99	3.00E-05
50	0.7	0.2	-1	1	0.03	0.04	1.6	0.3	10	1	145.93	0
50	0.4	0.2	-1	1	0.03	0.04	2	0.5	10	1	143.54	0
50	0.4	0.2	-1	1	0.03	0.04	2	0.3	10	1	147.86	0
50	0.6	0.2	-1	1	0.03	0.04	2	0.2	10	1	143.1	1.00E-05
50	0.99	0.3	-1	1	0.03	0.04	2	0.8	10	1	144.63	0
50	0.4	0.3	-1	1	0.03	0.04	1.2	0.4	10	1	159.23	2.00E-05
50	0.3	0.2	-1	1	0.03	0.04	2	0.4	10	1	148.25	2.00E-05
50	0.8	0.1	-1	1	0.03	0.04	2	0	10	1	132.71	0
50	0.7	0.5	-1	1	0.03	0.04	0.8	0.8	10	1	192.34	5.00E-05
50	0.01	0.3	-1	1	0.03	0.04	2	0.7	10	1	144.76	0
50	0.2	0.2	-1	1	0.03	0.04	2	0.4	10	1	148.51	0
50	0.6	0.4	-1	1	0.03	0.04	0.8	0.6	10	1	179.41	4.00E-05
50	0.01	0.3	-1	1	0.03	0.04	2	0.6	10	1	149.85	0
50	0.7	0.2	-1	1	0.03	0.04	1.6	0.2	10	1	145.99	0
50	0.5	0.2	-1	1	0.03	0.04	1.6	0.2	10	1	152.21	0
50	0.3	0.3	-1	1	0.03	0.04	1.2	0.4	10	1	161.36	2.00E-05
50	0.4	0.2	-1	1	0.03	0.04	2	0.2	10	1	149.7	0
50	0.9	0.1	-1	1	0.03	0.04	1.2	0	10	1	144.6	2.00E-05
50	0.5	0.2	-1	1	0.03	0.04	2	0.2	10	1	146.5	0
50	0.9	0.2	-1	1	0.03	0.04	0.8	0.2	10	1	169.89	0.00014
50	0.5	0.3	-1	1	0.03	0.04	1.2	0.4	10	1	162.01	1.00E-05
50	0.6	0.2	-1	1	0.03	0.04	2	0.3	10	1	142.55	0
50	0.6	0.4	-1	1	0.03	0.04	0.8	0.5	10	1	179.47	7.00E-05
50	0.3	0.2	-1	1	0.03	0.04	2	0.3	10	1	150.57	0
50	0.8	0.4	-1	1	0.03	0.04	0.8	0.6	10	1	191.91	0.00014
50	0.1	0.3	-1	1	0.03	0.04	1.6	0.5	10	1	151.07	0
50	0.7	0.1	-1	1	0.03	0.04	2	0	10	1	137.42	0
50	0.99	0.1	-1	1	0.03	0.04	0.8	0	10	1	155.58	0.00011
50	0.8	0.5	-1	1	0.03	0.04	0.8	0.8	10	1	204.79	0.00016
50	0.4	0.2	-1	1	0.03	0.04	1.6	0.3	10	1	152.95	1.00E-05
50	0.7	0.4	-1	1	0.03	0.04	0.8	0.6	10	1	185.16	8.00E-05
50	0.5	0.2	-1	1	0.03	0.04	2	0.3	10	1	144.8	1.00E-05
50	0.99	0.4	-1	1	0.03	0.04	0.8	0.6	10	1	204.38	0.00011
50	0.1	0.6	-1	1	0.03	0.04	0.2	0.3	10	1	202.77	0.00094
50	0.4	0.2	-1	1	0.03	0.04	1.6	0.2	10	1	153.64	4.00E-05
50	0.8	0.2	-1	1	0.03	0.04	1.6	0.2	10	1	144.25	0
50	0.3	0.2	-1	1	0.03	0.04	2	0.2	10	1	152.47	3.00E-05
50	0.6	0.2	-1	1	0.03	0.04	1.6	0.3	10	1	148.93	0
50	0.9	0.4	-1	1	0.03	0.04	0.8	0.6	10	1	197.52	0.00018
50	0.01	0.3	-1	1	0.03	0.04	1.6	0.5	10	1	155.45	0
50	0.99	0.2	-1	1	0.03	0.04	0.8	0.1	10	1	164.85	4.00E-05
50	0.9	0.2	-1	1	0.03	0.04	0.8	0.1	10	1	169.18	7.00E-05
50	0.5	0.2	-1	1	0.03	0.04	2	0.1	10	1	146.96	0
50	0.4	0.3	-1	1	0.03	0.04	1.2	0.3	10	1	165.18	1.00E-05
50	0.01	0.3	-1	1	0.03	0.04	1.2	0.4	10	1	163.07	2.00E-05
50	0.5	0.3	-1	1	0.03	0.04	1.2	0.3	10	1	164.83	2.00E-05
50	0.6	0.2	-1	1	0.03	0.04	1.2	0.2	10	1	159.83	3.00E-05
50	0.8	0.2	-1	1	0.03	0.04	1.6	0.1	10	1	143.78	0
50	0.9	0.4	-1	1	0.03	0.04	0.8	0.5	10	1	198.5	0.00012
50	0.5	0.2	-1	1	0.03	0.04	1.6	0.3	10	1	151.44	3.00E-05
50	0.99	0.1	-1	1	0.03	0.04	1.6	0	10	1	130.74	0
50	0.3	0.2	-1	1	0.03	0.04	1.6	0.2	10	1	156.99	1.00E-05
50	0.3	0.3	-1	1	0.03	0.04	1.2	0.3	10	1	165.18	2.00E-05
50	0.7	0.2	-1	1	0.03	0.04	1.6	0.1	10	1	146.63	0
50	0.4	0.2	-1	1	0.03	0.04	2	0.1	10	1	150.06	0
50	0.6	0.2	-1	1	0.03	0.04	1.6	0.1	10	1	151.33	1.00E-05
50	0.6	0.99	-1	1	0.03	0.04	0.04	0.6	10	1	390.72	7.00E-05
50	0.8	0.4	-1	1	0.03	0.04	0.8	0.5	10	1	194.82	9.00E-05
50	0.99	0.2	-1	1	0.03	0.04	0.8	0.2	10	1	167.57	0.00012
50	0.5	0.7	-1	1	0.03	0.04	0.2	0.5	10	1	250.87	0.00059
50	0.9	0.3	-1	1	0.03	0.04	0.8	0.3	10	1	180.9	9.00E-05
50	0.01	0.3	-1	1	0.03	0.04	0.8	0.4	10	1	168.65	1.00E-05
50	0.8	0.2	-1	1	0.03	0.04	1.2	0.1	10	1	154.35	2.00E-05
50	0.2	0.2	-1	1	0.03	0.04	1.6	0.3	10	1	157.9	2.00E-05
50	0.8	0.2	-1	1	0.03	0.04	0.8	0.1	10	1	173.42	0.00018
50	0.99	0.4	-1	1	0.03	0.04	0.8	0.7	10	1	208.61	0.00029
50	0.8	0.2	-1	1	0.03	0.04	0.8	0.2	10	1	173.92	0.00019
50	0.99	0.4	-1	1	0.03	0.04	0.8	0.5	10	1	203.4	9.00E-05
50	0.3	0.2	-1	1	0.03	0.04	1.6	0.3	10	1	154.49	0
50	0.2	0.3	-1	1	0.03	0.04	1.2	0.3	10	1	165.4	4.00E-05
50	0.9	0.1	-1	1	0.03	0.04	1.6	0	10	1	135.78	1.00E-05
50	0.9	0.3	-1	1	0.03	0.04	0.8	0.4	10	1	184.02	0.00019
50	0.8	0.3	-1	1	0.03	0.04	0.8	0.4	10	1	182.34	8.00E-05
50	0.6	0.2	-1	1	0.03	0.04	1.2	0.1	10	1	160.73	1.00E-05
50	0.5	0.2	-1	1	0.03	0.04	1.6	0.1	10	1	154.07	2.00E-05
50	0.7	0.2	-1	1	0.03	0.04	1.2	0.1	10	1	157.22	2.00E-05
50	0.1	0.2	-1	1	0.03	0.04	2	0.4	10	1	151.67	0
50	0.8	0.1	-1	1	0.03	0.04	1.6	0	10	1	140.06	0
50	0.4	0.3	-1	1	0.03	0.04	1.6	0.6	10	1	150.57	0
50	0.1	0.2	-1	1	0.03	0.04	1.6	0.3	10	1	159.17	3.00E-05
50	0.01	0.2	-1	1	0.03	0.04	2	0.5	10	1	153.68	1.00E-05
50	0.8	0.4	-1	1	0.03	0.04	0.8	0.7	10	1	191.07	0.00014
50	0.3	0.2	-1	1	0.03	0.04	2	0.1	10	1	155.95	4.00E-05
50	0.9	0.1	-1	1	0.03	0.04	0.8	0	10	1	160.75	0.00011
50	0.9	0.5	-1	1	0.03	0.04	0.8	0.9	10	1	219.73	0.00025
50	0.7	0.2	-1	1	0.03	0.04	0.8	0.2	10	1	177.08	0.00021
50	0.8	0.2	-1	1	0.03	0.04	1.2	0.2	10	1	153.12	0
50	0.01	0.2	-1	1	0.03	0.04	2	0.4	10	1	159.44	0
50	0.9	0.4	-1	1	0.03	0.04	0.8	0.7	10	1	199.32	0.0003
50	0.7	0.2	-1	1	0.03	0.04	1.2	0.2	10	1	156.07	2.00E-05
50	0.5	0.2	-1	1	0.03	0.04	1.2	0.1	10	1	165.55	3.00E-05
50	0.2	0.2	-1	1	0.03	0.04	2	0.1	10	1	158.4	3.00E-05
50	0.2	0.2	-1	1	0.03	0.04	2	0.2	10	1	154.1	1.00E-05
50	0.1	0.3	-1	1	0.03	0.04	1.2	0.3	10	1	166.42	7.00E-05
50	0.7	0.3	-1	1	0.03	0.04	0.8	0.3	10	1	182.68	0.00023
50	0.1	0.3	-1	1	0.03	0.04	0.8	0.4	10	1	167.39	9.00E-05
50	0.2	0.3	-1	1	0.03	0.04	0.8	0.4	10	1	170.28	9.00E-05
50	0.6	0.1	-1	1	0.03	0.04	2	0	10	1	141.61	1.00E-05
50	0.8	0.3	-1	1	0.03	0.04	0.8	0.3	10	1	182.59	0.00014
50	0.01	0.3	-1	1	0.03	0.04	0.8	0.3	10	1	179.74	6.00E-05
50	0.7	0.1	-1	1	0.03	0.04	1.6	0	10	1	144.07	2.00E-05
50	0.9	0.5	-1	1	0.03	0.04	0.8	0.8	10	1	219.91	0.00012
50	0.5	0.2	-1	1	0.03	0.04	1.2	0.2	10	1	162.47	5.00E-05
50	0.3	0.3	-1	1	0.03	0.04	0.8	0.4	10	1	172.26	9.00E-05
50	0.1	0.2	-1	1	0.03	0.04	2	0.2	10	1	158.8	4.00E-05
50	0.2	0.2	-1	1	0.03	0.04	2	0.5	10	1	146.26	0
50	0.6	0.3	-1	1	0.03	0.04	0.8	0.4	10	1	178.75	0.00016
50	0.7	0.3	-1	1	0.03	0.04	0.8	0.4	10	1	180.65	0.00025
50	0.4	0.3	-1	1	0.03	0.04	0.8	0.4	10	1	174.74	9.00E-05
50	0.1	0.2	-1	1	0.03	0.04	2	0.5	10	1	149.66	1.00E-05
50	0.4	0.2	-1	1	0.03	0.04	1.2	0.2	10	1	165.04	0.00013
50	0.01	0.3	-1	1	0.03	0.04	1.2	0.3	10	1	174.22	6.00E-05
50	0.6	0.1	-1	1	0.03	0.04	1.6	0	10	1	148.53	0
50	0.8	0.1	-1	1	0.03	0.04	1.2	0	10	1	149.6	1.00E-05
50	0.3	0.2	-1	1	0.03	0.04	1.2	0.2	10	1	167.54	6.00E-05
50	0.5	0.1	-1	1	0.03	0.04	2	0	10	1	146.63	0
50	0.2	0.2	-1	1	0.03	0.04	1.6	0.2	10	1	159.43	7.00E-05
50	0.01	0.6	-1	1	0.03	0.04	0.2	0.4	10	1	161.17	2.00E-05
50	0.2	0.99	-1	1	0.03	0.04	0.04	0.2	10	1	298.25	0.00724
50	0.99	0.5	-1	1	0.03	0.04	0.8	0.8	10	1	236.78	0.00024
50	0.2	0.2	-1	1	0.03	0.04	1.2	0.2	10	1	168.91	0.00014
50	0.4	0.2	-1	1	0.03	0.04	1.2	0.1	10	1	167.21	7.00E-05
50	0.8	0.1	-1	1	0.03	0.04	0.8	0	10	1	168.61	0.00031
50	0.2	0.6	-1	1	0.03	0.04	0.2	0.3	10	1	219.95	0.00135
50	0.1	0.2	-1	1	0.03	0.04	2	0.1	10	1	162.65	5.00E-05
50	0.7	0.1	-1	1	0.03	0.04	1.2	0	10	1	154.83	6.00E-05
50	0.5	0.2	-1	1	0.03	0.04	0.8	0.1	10	1	183.07	0.00037
50	0.4	0.3	-1	1	0.03	0.04	0.8	0.3	10	1	178.51	0.0002
50	0.6	0.2	-1	1	0.03	0.04	0.8	0.1	10	1	181.46	0.00033
50	0.3	0.2	-1	1	0.03	0.04	1.2	0.1	10	1	170.07	0.0001
50	0.5	0.2	-1	1	0.03	0.04	0.8	0.2	10	1	179.44	0.00037
50	0.2	0.1	-1	1	0.03	0.04	1.2	0	10	1	180.97	0.00041
50	0.6	0.1	-1	1	0.03	0.04	1.2	0	10	1	159.29	6.00E-05
50	0.6	0.8	-1	1	0.03	0.04	0.2	0.7	10	1	278.46	0.00012
50	0.1	0.2	-1	1	0.03	0.04	1.6	0.2	10	1	165.04	6.00E-05
50	0.3	0.3	-1	1	0.03	0.04	0.8	0.3	10	1	179.8	0.00017
50	0.6	0.2	-1	1	0.03	0.04	0.8	0.2	10	1	177.19	0.00034
50	0.7	0.99	-1	1	0.03	0.04	0.04	0.7	10	1	514.9	0.00015
50	0.01	0.2	-1	1	0.03	0.04	2	0.3	10	1	164.46	2.00E-05
50	0.5	0.3	-1	1	0.03	0.04	0.8	0.3	10	1	182.51	0.00022
50	0.2	0.3	-1	1	0.03	0.04	0.8	0.3	10	1	177.81	0.0002
50	0.5	0.99	-1	1	0.03	0.04	0.04	0.4	10	1	370	0.00107
50	0.6	0.3	-1	1	0.03	0.04	0.8	0.3	10	1	182.7	0.00022
50	0.1	0.2	-1	1	0.03	0.04	1.6	0.1	10	1	169.77	0.00011
50	0.1	0.3	-1	1	0.03	0.04	0.8	0.3	10	1	178.45	0.00021
50	0.4	0.2	-1	1	0.03	0.04	1.6	0.1	10	1	157.13	2.00E-05
50	0.5	0.1	-1	1	0.03	0.04	1.2	0	10	1	164.4	0.00016
50	0.4	0.1	-1	1	0.03	0.04	1.6	0	10	1	157.01	8.00E-05
50	0.7	0.99	-1	1	0.03	0.04	0.04	0.8	10	1	468.26	0
50	0.4	0.99	-1	1	0.03	0.04	0.04	0.3	10	1	353.13	0.00305
50	0.2	0.2	-1	1	0.03	0.04	1.2	0.1	10	1	176.15	0.00024
50	0.3	0.6	-1	1	0.03	0.04	0.2	0.3	10	1	239.36	0.00188
50	0.01	0.2	-1	1	0.03	0.04	2	0.1	10	1	176.99	0.00012
50	0.01	0.2	-1	1	0.03	0.04	1.6	0.2	10	1	177.15	0.00014
50	0.01	0.2	-1	1	0.03	0.04	1.6	0.1	10	1	183.01	0.00028
50	0.1	0.2	-1	1	0.03	0.04	1.2	0.1	10	1	180.39	0.00029
50	0.01	0.2	-1	1	0.03	0.04	0.8	0.2	10	1	195.07	0.00047
50	0.3	0.1	-1	1	0.03	0.04	2	0	10	1	154.98	6.00E-05
50	0.4	0.1	-1	1	0.03	0.04	1.2	0	10	1	169.29	0.00021
50	0.1	0.2	-1	1	0.03	0.04	1.2	0.2	10	1	173.67	0.00017
50	0.2	0.1	-1	1	0.03	0.04	2	0	10	1	160.34	4.00E-05
50	0.99	0.3	-1	1	0.03	0.04	1.2	0.4	10	1	160.41	1.00E-05
50	0.7	0.1	-1	1	0.03	0.04	0.8	0	10	1	173.78	0.00037
50	0.1	0.2	-1	1	0.03	0.04	0.8	0.2	10	1	189.45	0.00065
50	0.99	0.4	-1	1	0.03	0.04	1.6	0.8	10	1	166.55	0
50	0.3	0.1	-1	1	0.03	0.04	1.2	0	10	1	175.4	0.00034
50	0.2	0.2	-1	1	0.03	0.04	0.8	0.2	10	1	187.48	0.00059
50	0.3	0.1	-1	1	0.03	0.04	1.6	0	10	1	163.69	0.00014
50	0.2	0.3	-1	1	0.03	0.04	2	0.7	10	1	141.88	0
50	0.3	0.3	-1	1	0.03	0.04	2	0.7	10	1	142.93	0
50	0.7	0.99	-1	1	0.03	0.04	0.04	0.6	10	1	554.87	0.00046
50	0.01	0.2	-1	1	0.03	0.04	1.2	0.2	10	1	182.05	0.00026
50	0.7	0.8	-1	1	0.03	0.04	0.2	0.7	10	1	351.4	0.00061
50	0.01	0.3	-1	1	0.03	0.04	1.2	0.5	10	1	156.52	0
50	0.7	0.9	-1	1	0.03	0.04	0.2	0.9	10	1	365.89	0
50	0.7	0.2	-1	1	0.03	0.04	0.8	0.1	10	1	176.89	0.00017
50	0.5	0.1	-1	1	0.03	0.04	0.8	0	10	1	183.95	0.00059
50	0.01	0.3	-1	1	0.03	0.04	1.6	0.7	10	1	144.09	0
50	0.6	0.1	-1	1	0.03	0.04	0.8	0	10	1	179.02	0.00049
50	0.7	0.9	-1	1	0.03	0.04	0.2	0.8	10	1	379.1	0.0001
50	0.3	0.2	-1	1	0.03	0.04	0.8	0.1	10	1	192.57	0.00064
50	0.2	0.1	-1	1	0.03	0.04	1.6	0	10	1	167.88	0.0001
50	0.6	0.7	-1	1	0.03	0.04	0.2	0.5	10	1	292.03	0.00138
50	0.2	0.2	-1	1	0.03	0.04	0.8	0.1	10	1	195.4	0.00094
50	0.7	0.5	-1	1	0.03	0.04	0.8	0.9	10	1	190.63	2.00E-05
50	0.1	0.2	-1	1	0.03	0.04	0.8	0.1	10	1	199.94	0.00101
50	0.4	0.4	-1	1	0.03	0.04	0.8	0.5	10	1	172.3	3.00E-05
50	0.4	0.6	-1	1	0.03	0.04	0.2	0.3	10	1	262.73	0.00266
50	0.1	0.1	-1	1	0.03	0.04	2	0	10	1	167.27	0.00011
50	0.8	0.5	-1	1	0.03	0.04	0.8	0.9	10	1	204.3	9.00E-05
50	0.5	0.4	-1	1	0.03	0.04	0.8	0.5	10	1	176.99	4.00E-05
50	0.01	0.5	-1	1	0.03	0.04	0.2	0.2	10	1	226.46	0.00263
50	0.01	0.2	-1	1	0.03	0.04	1.2	0.1	10	1	195.45	0.00081
50	0.4	0.6	-1	1	0.03	0.04	0.2	0.4	10	1	236.08	0.00115
50	0.5	0.6	-1	1	0.03	0.04	0.2	0.3	10	1	285.39	0.00402
50	0.4	0.1	-1	1	0.03	0.04	0.8	0	10	1	191.47	0.00102
50	0.01	0.2	-1	1	0.03	0.04	2	0.2	10	1	168.75	3.00E-05
50	0.3	0.99	-1	1	0.03	0.04	0.04	0.2	10	1	353.45	0.00953
50	0.01	0.1	-1	1	0.03	0.04	2	0	10	1	184	0.00036
50	0.3	0.6	-1	1	0.03	0.04	0.2	0.4	10	1	217.3	0.00059
50	0.01	0.2	-1	1	0.03	0.04	0.8	0.1	10	1	214.61	0.00157
50	0.3	0.1	-1	1	0.03	0.04	0.8	0	10	1	197	0.00137
50	0.9	0.2	-1	1	0.03	0.04	1.2	0.2	10	1	150.07	1.00E-05
50	0.7	0.7	-1	1	0.03	0.04	0.2	0.5	10	1	349.95	0.00332
50	0.1	0.1	-1	1	0.03	0.04	1.6	0	10	1	177.1	0.00031
50	0.2	0.2	-1	1	0.03	0.04	2	0.3	10	1	152.5	1.00E-05
50	0.5	0.6	-1	1	0.03	0.04	0.2	0.4	10	1	263.28	0.00186
50	0.1	0.2	-1	1	0.03	0.04	2	0.3	10	1	154.55	1.00E-05
50	0.1	0.6	-1	1	0.03	0.04	0.2	0.4	10	1	179.42	0.00017
50	0.99	0.4	-1	1	0.03	0.04	0.2	0.1	10	1	332.59	0.00854
50	0.1	0.1	-1	1	0.03	0.04	1.2	0	10	1	189.2	0.00093
50	0.3	0.2	-1	1	0.03	0.04	1.6	0.1	10	1	159.08	6.00E-05
50	0.01	0.1	-1	1	0.03	0.04	1.6	0	10	1	191.61	0.00077
50	0.99	0.2	-1	1	0.03	0.04	0.2	0	10	1	268.49	0.00621
50	0.2	0.6	-1	1	0.03	0.04	0.2	0.4	10	1	197.64	0.00036
50	0.6	0.99	-1	1	0.03	0.04	0.04	0.4	10	1	486.53	0.00221
50	0.1	0.5	-1	1	0.03	0.04	0.2	0.2	10	1	245.19	0.00436
50	0.2	0.2	-1	1	0.03	0.04	1.6	0.1	10	1	164.91	8.00E-05
50	0.2	0.5	-1	1	0.03	0.04	0.2	0.2	10	1	255.67	0.00507
50	0.01	0.7	-1	1	0.03	0.04	0.04	0.1	10	1	278.62	0.01465
50	0.3	0.5	-1	1	0.03	0.04	0.2	0.2	10	1	263.19	0.00552
50	0.6	0.6	-1	1	0.03	0.04	0.2	0.4	10	1	296.83	0.00347
50	0.1	0.1	-1	1	0.03	0.04	0.8	0	10	1	211.55	0.00224
50	0.6	0.1	-1	1	0.03	0.04	0.04	0	10	1	381.51	0.03747
50	0.01	0.1	-1	1	0.03	0.04	1.2	0	10	1	205.06	0.00153
50	0.6	0.6	-1	1	0.03	0.04	0.2	0.3	10	1	314.24	0.00534
50	0.9	0.2	-1	1	0.03	0.04	0.2	0	10	1	276.69	0.00762
50	0.8	0.6	-1	1	0.03	0.04	0.2	0.4	10	1	375.73	0.00913
50	0.7	0.99	-1	1	0.03	0.04	0.04	0.5	10	1	622.95	0.00151
50	0.8	0.9	-1	1	0.03	0.04	0.2	0.9	10	1	545	0.00047
50	0.99	0.5	-1	1	0.03	0.04	0.2	0.2	10	1	394	0.01273
50	0.4	0.99	-1	1	0.03	0.04	0.04	0.2	10	1	420.81	0.01262
50	0.4	0.5	-1	1	0.03	0.04	0.2	0.2	10	1	282.94	0.00736
50	0.8	0.6	-1	1	0.03	0.04	0.2	0.3	10	1	386.61	0.0094
50	0.9	0.9	-1	1	0.03	0.04	0.2	0.8	10	1	983.78	0.0087
50	0.7	0.5	-1	1	0.03	0.04	0.2	0.2	10	1	332.9	0.00956
50	0.99	0.1	-1	1	0.03	0.04	0.04	0	10	1	358.39	0.03397
50	0.9	0.5	-1	1	0.03	0.04	0.2	0.2	10	1	369.97	0.01127
50	0.7	0.6	-1	1	0.03	0.04	0.2	0.3	10	1	344.32	0.00647
50	0.8	0.5	-1	1	0.03	0.04	0.2	0.2	10	1	355.51	0.01035
50	0.8	0.2	-1	1	0.03	0.04	0.2	0	10	1	286.82	0.00964
50	0.8	0.8	-1	1	0.03	0.04	0.2	0.7	10	1	466.72	0.00343
50	0.8	0.99	-1	1	0.03	0.04	0.04	0.9	10	1	739.28	8.00E-05
50	0.9	0.4	-1	1	0.03	0.04	0.2	0.1	10	1	333.22	0.0095
50	0.8	0.4	-1	1	0.03	0.04	0.2	0.1	10	1	323.89	0.00969
50	0.8	0.9	-1	1	0.03	0.04	0.2	0.8	10	1	565.03	0.00092
50	0.01	0.1	-1	1	0.03	0.04	0.8	0	10	1	234.65	0.00439
50	0.9	0.6	-1	1	0.03	0.04	0.2	0.3	10	1	427.34	0.01136
50	0.5	0.99	-1	1	0.03	0.04	0.04	0.2	10	1	503.69	0.01542
50	0.7	0.2	-1	1	0.03	0.04	0.2	0	10	1	291.89	0.01086
50	0.8	0.7	-1	1	0.03	0.04	0.2	0.5	10	1	423.41	0.00722
50	0.7	0.4	-1	1	0.03	0.04	0.2	0.1	10	1	321	0.01046
50	0.1	0.7	-1	1	0.03	0.04	0.04	0.1	10	1	311.94	0.01972
50	0.9	0.6	-1	1	0.03	0.04	0.2	0.4	10	1	442.68	0.01512
50	0.99	0.6	-1	1	0.03	0.04	0.2	0.4	10	1	493.88	0.02107
50	0.6	0.2	-1	1	0.03	0.04	0.2	0	10	1	300.55	0.01312
50	0.8	0.8	-1	1	0.03	0.04	0.2	0.6	10	1	488.48	0.00423
50	0.6	0.4	-1	1	0.03	0.04	0.2	0.1	10	1	312.52	0.01078
50	0.8	0.99	-1	1	0.03	0.04	0.04	0.8	10	1	793.46	0.00028
50	0.5	0.4	-1	1	0.03	0.04	0.2	0.1	10	1	307.04	0.01122
50	0.7	0.6	-1	1	0.03	0.04	0.2	0.4	10	1	332.23	0.00609
50	0.4	0.4	-1	1	0.03	0.04	0.2	0.1	10	1	302.79	0.01066
50	0.9	0.7	-1	1	0.03	0.04	0.2	0.5	10	1	524.15	0.01386
50	0.01	0.4	-1	1	0.03	0.04	0.2	0.1	10	1	283.73	0.01074
50	0.7	0.99	-1	1	0.03	0.04	0.04	0.3	10	1	774.97	0.01143
50	0.2	0.1	-1	1	0.03	0.04	0.04	0	10	1	386.3	0.03779
50	0.1	0.4	-1	1	0.03	0.04	0.2	0.1	10	1	284.02	0.01148
50	0.8	0.99	-1	1	0.03	0.04	0.04	0.7	10	1	857.7	0.00089
50	0.99	0.7	-1	1	0.03	0.04	0.2	0.5	10	1	643.6	0.02419
50	0.7	0.99	-1	1	0.03	0.04	0.04	0.4	10	1	698.35	0.00479
50	0.2	0.7	-1	1	0.03	0.04	0.04	0.1	10	1	338.29	0.02165
50	0.5	0.2	-1	1	0.03	0.04	0.2	0	10	1	306.83	0.01422
50	0.4	0.2	-1	1	0.03	0.04	0.2	0	10	1	307.5	0.01578
50	0.3	0.7	-1	1	0.03	0.04	0.04	0.1	10	1	369.09	0.02333
50	0.3	0.2	-1	1	0.03	0.04	0.2	0	10	1	315.39	0.01727
50	0.5	0.5	-1	1	0.03	0.04	0.2	0.2	10	1	294.52	0.00683
50	0.2	0.2	-1	1	0.03	0.04	0.2	0	10	1	317.42	0.01823
50	0.6	0.5	-1	1	0.03	0.04	0.2	0.2	10	1	314.43	0.00858
50	0.9	0.8	-1	1	0.03	0.04	0.2	0.7	10	1	667.23	0.01202
50	0.4	0.7	-1	1	0.03	0.04	0.04	0.1	10	1	399.68	0.02395
50	0.99	0.6	-1	1	0.03	0.04	0.2	0.3	10	1	480.68	0.01551
50	0.9	0.1	-1	1	0.03	0.04	0.04	0	10	1	363.49	0.03449
50	0.9	0.8	-1	1	0.03	0.04	0.2	0.6	10	1	673.38	0.01198
50	0.8	0.99	-1	1	0.03	0.04	0.04	0.6	10	1	935.32	0.00231
50	0.8	0.99	-1	1	0.03	0.04	0.04	0.3	10	1	1171.4	0.01677
50	0.99	0.8	-1	1	0.03	0.04	0.2	0.7	10	1	939.01	0.03094
50	0.6	0.7	-1	1	0.03	0.04	0.04	0.1	10	1	487.28	0.02862
50	0.1	0.2	-1	1	0.03	0.04	0.2	0	10	1	325.89	0.02073
50	0.6	0.99	-1	1	0.03	0.04	0.04	0.2	10	1	636.99	0.01914
50	0.8	0.99	-1	1	0.03	0.04	0.04	0.5	10	1	1020.9	0.00521
50	0.5	0.7	-1	1	0.03	0.04	0.04	0.1	10	1	443.54	0.02696
50	0.99	0.7	-1	1	0.03	0.04	0.04	0.1	10	1	855.47	0.04149
50	0.3	0.1	-1	1	0.03	0.04	0.04	0	10	1	391.37	0.03844
50	0.01	0.2	-1	1	0.03	0.04	0.2	0	10	1	334.73	0.02362
50	0.7	0.7	-1	1	0.03	0.04	0.04	0.1	10	1	551.23	0.0304
50	0.8	0.7	-1	1	0.03	0.04	0.04	0.1	10	1	635.79	0.0344
50	0.01	0.1	-1	1	0.03	0.04	0.04	0	10	1	400.66	0.04151
50	0.2	0.4	-1	1	0.03	0.04	0.2	0.1	10	1	289.41	0.01148
50	0.3	0.4	-1	1	0.03	0.04	0.2	0.1	10	1	298.76	0.01118
50	0.9	0.7	-1	1	0.03	0.04	0.04	0.1	10	1	728.76	0.03642
50	0.7	0.1	-1	1	0.03	0.04	0.04	0	10	1	376.15	0.0362
50	0.1	0.1	-1	1	0.03	0.04	0.04	0	10	1	386.8	0.03923
50	0.99	0.8	-1	1	0.03	0.04	0.2	0.6	10	1	930.28	0.02578
50	0.5	0.1	-1	1	0.03	0.04	0.04	0	10	1	384.87	0.03623
50	0.4	0.1	-1	1	0.03	0.04	0.04	0	10	1	388.28	0.0376
50	0.9	0.9	-1	1	0.03	0.04	0.2	0.9	10	1	949.41	0.0082
50	0.7	0.99	-1	1	0.03	0.04	0.04	0.2	10	1	856.04	0.02346
50	0.8	0.99	-1	1	0.03	0.04	0.04	0.4	10	1	1094.6	0.01008
50	0.99	0.9	-1	1	0.03	0.04	0.2	0.8	10	1	1859.1	0.03303
50	0.9	0.99	-1	1	0.03	0.04	0.04	0.9	10	1	1861.8	0.00344
50	0.8	0.1	-1	1	0.03	0.04	0.04	0	10	1	372.82	0.03552
50	0.9	0.99	-1	1	0.03	0.04	0.04	0.7	10	1	2033.7	0.00814
50	0.8	0.99	-1	1	0.03	0.04	0.04	0.2	10	1	1281.1	0.02869
50	0.9	0.99	-1	1	0.03	0.04	0.04	0.5	10	1	2244	0.01783
50	0.9	0.99	-1	1	0.03	0.04	0.04	0.3	10	1	2352.2	0.02844
50	0.9	0.99	-1	1	0.03	0.04	0.04	0.6	10	1	2104.7	0.0128
50	0.9	0.99	-1	1	0.03	0.04	0.04	0.8	10	1	1960.3	0.00557
50	0.99	0.9	-1	1	0.03	0.04	0.2	0.9	10	1	1862.5	0.03591
50	0.9	0.99	-1	1	0.03	0.04	0.04	0.4	10	1	2256	0.02195
50	0.9	0.99	-1	1	0.03	0.04	0.04	0.2	10	1	2393.9	0.03457
50	0.99	0.99	-1	1	0.03	0.04	0.04	0.7	10	1	12912	0.04573
50	0.99	0.99	-1	1	0.03	0.04	0.04	0.3	10	1	12783	0.0437
50	0.99	0.99	-1	1	0.03	0.04	0.04	0.5	10	1	12766	0.0456
50	0.99	0.99	-1	1	0.03	0.04	0.04	0.4	10	1	13010	0.04667
50	0.99	0.99	-1	1	0.03	0.04	0.04	0.2	10	1	12934	0.04487
50	0.99	0.99	-1	1	0.03	0.04	0.04	0.8	10	1	12918	0.04514
50	0.99	0.99	-1	1	0.03	0.04	0.04	0.6	10	1	12774	0.04499
50	0.99	0.99	-1	1	0.03	0.04	0.04	0.9	10	1	13034	0.04633
10	0.6	0.1	-1	1	0.03	0.04	0.04	0	10	1	41.137	0.11559
10	0.3	0.1	-1	1	0.03	0.04	0.04	0	10	1	42.203	0.11528
10	0.99	0.1	-1	1	0.03	0.04	0.04	0	10	1	38.129	0.11221
10	0.99	0.6	-1	1	0.03	0.04	0.04	0.1	10	1	71.889	0.12075
10	0.5	0.1	-1	1	0.03	0.04	0.04	0	10	1	41.739	0.11526
10	0.1	0.99	-1	1	0.03	0.04	0.04	0.2	10	1	31.907	0.08247
10	0.9	0.1	-1	1	0.03	0.04	0.04	0	10	1	38.848	0.11275
10	0.01	0.99	-1	1	0.03	0.04	0.04	0.6	10	1	17.145	0.00298
10	0.01	0.99	-1	1	0.03	0.04	0.04	0.4	10	1	21.673	0.01922
10	0.2	0.99	-1	1	0.03	0.04	0.04	0.4	10	1	33.254	0.05376
10	0.8	0.1	-1	1	0.03	0.04	0.04	0	10	1	39.969	0.115
10	0.1	0.99	-1	1	0.03	0.04	0.04	0.8	10	1	21.628	0.00293
10	0.7	0.1	-1	1	0.03	0.04	0.04	0	10	1	40.776	0.11697
10	0.01	0.99	-1	1	0.03	0.04	0.04	0.7	10	1	15.451	0.00082
10	0.01	0.99	-1	1	0.03	0.04	0.04	0.5	10	1	19.104	0.00831
10	0.01	0.99	-1	1	0.03	0.04	0.04	0.3	10	1	24.199	0.03743
10	0.01	0.99	-1	1	0.03	0.04	0.04	0.8	10	1	14.062	0.00012
10	0.5	0.99	-1	1	0.03	0.04	0.04	0.6	10	1	50.495	0.04713
10	0.1	0.99	-1	1	0.03	0.04	0.04	0.7	10	1	23.294	0.0073
10	0.01	0.99	-1	1	0.03	0.04	0.04	0.2	10	1	26.727	0.06207
10	0.1	0.99	-1	1	0.03	0.04	0.04	0.4	10	1	28.741	0.04285
10	0.1	0.99	-1	1	0.03	0.04	0.04	0.3	10	1	30.194	0.06156
10	0.1	0.99	-1	1	0.03	0.04	0.04	0.6	10	1	25.31	0.01629
10	0.2	0.99	-1	1	0.03	0.04	0.04	0.7	10	1	28.425	0.01469
10	0.01	0.99	-1	1	0.03	0.04	0.04	0.9	10	1	13.015	0
10	0.6	0.99	-1	1	0.03	0.04	0.04	0.4	10	1	65.904	0.078
10	0.4	0.99	-1	1	0.03	0.04	0.04	0.9	10	1	36.87	0.01214
10	0.2	0.99	-1	1	0.03	0.04	0.04	0.6	10	1	30.165	0.02501
10	0.1	0.99	-1	1	0.03	0.04	0.04	0.5	10	1	27.07	0.02801
10	0.6	0.99	-1	1	0.03	0.04	0.04	0.8	10	1	60.083	0.0367
10	0.2	0.99	-1	1	0.03	0.04	0.04	0.2	10	1	35.727	0.08735
10	0.3	0.99	-1	1	0.03	0.04	0.04	0.7	10	1	34.361	0.02154
10	0.2	0.99	-1	1	0.03	0.04	0.04	0.9	10	1	25.11	0.00301
10	0.3	0.99	-1	1	0.03	0.04	0.04	0.5	10	1	36.798	0.04642
10	0.1	0.99	-1	1	0.03	0.04	0.04	0.9	10	1	20.396	0.00077
10	0.3	0.99	-1	1	0.03	0.04	0.04	0.2	10	1	40.961	0.09471
10	0.3	0.99	-1	1	0.03	0.04	0.04	0.3	10	1	39.692	0.07687
10	0.5	0.99	-1	1	0.03	0.04	0.04	0.5	10	1	52.021	0.06116
10	0.3	0.99	-1	1	0.03	0.04	0.04	0.6	10	1	35.275	0.03131
10	0.2	0.99	-1	1	0.03	0.04	0.04	0.3	10	1	34.467	0.06951
10	0.2	0.99	-1	1	0.03	0.04	0.04	0.8	10	1	26.925	0.00758
10	0.4	0.99	-1	1	0.03	0.04	0.04	0.8	10	1	38.563	0.01973
10	0.2	0.99	-1	1	0.03	0.04	0.04	0.5	10	1	31.599	0.03814
10	0.8	0.6	-1	1	0.03	0.04	0.04	0.1	10	1	60.819	0.11435
10	0.4	0.99	-1	1	0.03	0.04	0.04	0.5	10	1	43.151	0.05299
10	0.3	0.99	-1	1	0.03	0.04	0.04	0.8	10	1	32.249	0.01305
10	0.4	0.99	-1	1	0.03	0.04	0.04	0.3	10	1	45.836	0.08172
10	0.4	0.99	-1	1	0.03	0.04	0.04	0.2	10	1	46.782	0.09583
10	0.2	0.1	-1	1	0.03	0.04	0.04	0	10	1	42.113	0.11473
10	0.7	0.99	-1	1	0.03	0.04	0.04	0.2	10	1	89.437	0.10472
10	0.4	0.99	-1	1	0.03	0.04	0.04	0.7	10	1	39.961	0.02871
10	0.1	0.1	-1	1	0.03	0.04	0.04	0	10	1	42.785	0.11663
10	0.5	0.99	-1	1	0.03	0.04	0.04	0.7	10	1	48.547	0.03653
10	0.01	0.1	-1	1	0.03	0.04	0.04	0	10	1	42.287	0.11613
10	0.7	0.99	-1	1	0.03	0.04	0.04	0.9	10	1	79.952	0.0411
10	0.9	0.4	-1	1	0.03	0.04	0.2	0.1	10	1	46.514	0.09321
10	0.1	0.6	-1	1	0.03	0.04	0.04	0.1	10	1	38.658	0.1033
10	0.9	0.6	-1	1	0.03	0.04	0.04	0.1	10	1	66.259	0.11806
10	0.6	0.4	-1	1	0.03	0.04	0.2	0.1	10	1	44.174	0.09417
10	0.2	0.6	-1	1	0.03	0.04	0.04	0.1	10	1	40.655	0.10353
10	0.4	0.1	-1	1	0.03	0.04	0.04	0	10	1	41.959	0.1155
10	0.4	0.99	-1	1	0.03	0.04	0.04	0.6	10	1	41.676	0.04075
10	0.4	0.99	-1	1	0.03	0.04	0.04	0.4	10	1	44.644	0.06704
10	0.2	0.4	-1	1	0.03	0.04	0.2	0.1	10	1	40.149	0.09631
10	0.5	0.99	-1	1	0.03	0.04	0.04	0.2	10	1	55.279	0.09906
10	0.5	0.99	-1	1	0.03	0.04	0.04	0.4	10	1	53.149	0.07276
10	0.3	0.4	-1	1	0.03	0.04	0.2	0.1	10	1	41.099	0.09658
10	0.5	0.99	-1	1	0.03	0.04	0.04	0.3	10	1	54.361	0.08509
10	0.2	0.1	-1	1	0.03	0.04	0.2	0	10	1	40.619	0.10429
10	0.5	0.99	-1	1	0.03	0.04	0.04	0.9	10	1	45.93	0.01926
10	0.4	0.6	-1	1	0.03	0.04	0.04	0.1	10	1	45.884	0.11022
10	0.5	0.6	-1	1	0.03	0.04	0.04	0.1	10	1	49.18	0.11016
10	0.3	0.6	-1	1	0.03	0.04	0.04	0.1	10	1	42.95	0.10691
10	0.99	0.5	-1	1	0.03	0.04	0.2	0.3	10	1	54.783	0.11004
10	0.5	0.6	-1	1	0.03	0.04	0.2	0.4	10	1	44.061	0.07994
10	0.6	0.6	-1	1	0.03	0.04	0.2	0.4	10	1	47.386	0.08485
10	0.3	0.99	-1	1	0.03	0.04	0.04	0.9	10	1	30.692	0.00674
10	0.7	0.5	-1	1	0.03	0.04	0.2	0.3	10	1	47.715	0.09605
10	0.01	0.6	-1	1	0.03	0.04	0.04	0.1	10	1	36.319	0.09926
10	0.6	0.99	-1	1	0.03	0.04	0.04	0.7	10	1	61.496	0.04794
10	0.4	0.8	-1	1	0.03	0.04	0.2	0.6	10	1	39.752	0.04875
10	0.7	0.6	-1	1	0.03	0.04	0.04	0.1	10	1	56.463	0.11213
10	0.01	0.4	-1	1	0.03	0.04	0.2	0.2	10	1	36.805	0.08125
10	0.6	0.6	-1	1	0.03	0.04	0.04	0.1	10	1	51.953	0.10909
10	0.6	0.99	-1	1	0.03	0.04	0.04	0.2	10	1	68.143	0.10223
10	0.8	0.99	-1	1	0.03	0.04	0.04	0.2	10	1	129.88	0.10898
10	0.9	0.4	-1	1	0.03	0.04	0.2	0.2	10	1	46.92	0.10277
10	0.9	0.1	-1	1	0.03	0.04	0.2	0	10	1	36.43	0.0928
10	0.99	0.1	-1	1	0.03	0.04	0.2	0	10	1	35.582	0.08987
10	0.8	0.99	-1	1	0.03	0.04	0.04	0.9	10	1	121.42	0.05617
10	0.2	0.9	-1	1	0.03	0.04	0.2	0.9	10	1	26.037	0.00629
10	0.6	0.99	-1	1	0.03	0.04	0.04	0.5	10	1	65.222	0.06859
10	0.6	0.99	-1	1	0.03	0.04	0.04	0.3	10	1	67.426	0.09002
10	0.6	0.99	-1	1	0.03	0.04	0.04	0.6	10	1	63.847	0.05823
10	0.01	0.9	-1	1	0.03	0.04	0.2	0.9	10	1	17.344	0.00024
10	0.7	0.99	-1	1	0.03	0.04	0.04	0.4	10	1	87.805	0.08711
10	0.3	0.99	-1	1	0.03	0.04	0.04	0.4	10	1	38.252	0.0604
10	0.99	0.4	-1	1	0.03	0.04	0.2	0.1	10	1	47.149	0.09044
10	0.8	0.1	-1	1	0.03	0.04	0.8	0	10	1	31.787	0.05879
10	0.5	0.4	-1	1	0.03	0.04	0.2	0.1	10	1	43.193	0.09545
10	0.1	0.9	-1	1	0.03	0.04	0.2	0.8	10	1	24.222	0.00743
10	0.5	0.99	-1	1	0.03	0.04	0.04	0.8	10	1	47.474	0.02747
10	0.01	0.9	-1	1	0.03	0.04	0.2	0.8	10	1	18.84	0.00114
10	0.1	0.8	-1	1	0.03	0.04	0.2	0.6	10	1	28.395	0.02748
10	0.01	0.8	-1	1	0.03	0.04	0.2	0.7	10	1	22.378	0.00646
10	0.1	0.9	-1	1	0.03	0.04	0.2	0.9	10	1	22.332	0.00253
10	0.6	0.99	-1	1	0.03	0.04	0.04	0.9	10	1	58.431	0.02835
10	0.7	0.99	-1	1	0.03	0.04	0.04	0.7	10	1	82.801	0.05755
10	0.7	0.1	-1	1	0.03	0.04	0.8	0	10	1	32.939	0.0635
10	0.7	0.99	-1	1	0.03	0.04	0.04	0.6	10	1	84.789	0.06696
10	0.7	0.99	-1	1	0.03	0.04	0.04	0.5	10	1	85.943	0.07626
10	0.2	0.8	-1	1	0.03	0.04	0.2	0.6	10	1	31.802	0.03498
10	0.8	0.1	-1	1	0.03	0.04	0.2	0	10	1	37.122	0.09462
10	0.99	0.7	-1	1	0.03	0.04	0.2	0.5	10	1	84.75	0.11699
10	0.1	0.8	-1	1	0.03	0.04	0.2	0.7	10	1	27.043	0.01751
10	0.8	0.2	-1	1	0.03	0.04	0.8	0.1	10	1	33.269	0.05564
10	0.01	0.6	-1	1	0.03	0.04	0.2	0.4	10	1	31.328	0.04605
10	0.2	0.9	-1	1	0.03	0.04	0.2	0.8	10	1	27.879	0.0133
10	0.5	0.9	-1	1	0.03	0.04	0.2	0.9	10	1	42.915	0.0256
10	0.6	0.1	-1	1	0.03	0.04	0.2	0	10	1	38.891	0.09928
10	0.7	0.1	-1	1	0.03	0.04	0.2	0	10	1	38.401	0.09815
10	0.01	0.8	-1	1	0.03	0.04	0.2	0.6	10	1	24.469	0.01494
10	0.1	0.4	-1	1	0.03	0.04	0.2	0.1	10	1	39.047	0.09616
10	0.8	0.4	-1	1	0.03	0.04	0.2	0.2	10	1	45.979	0.10023
10	0.1	0.7	-1	1	0.03	0.04	0.2	0.5	10	1	31.05	0.04239
10	0.7	0.99	-1	1	0.03	0.04	0.04	0.3	10	1	88.333	0.09418
10	0.01	0.7	-1	1	0.03	0.04	0.2	0.5	10	1	27.946	0.02897
10	0.2	0.6	-1	1	0.03	0.04	0.2	0.4	10	1	36.077	0.06341
10	0.99	0.4	-1	1	0.03	0.04	0.2	0.2	10	1	47.482	0.10305
10	0.5	0.5	-1	1	0.03	0.04	0.2	0.3	10	1	43.52	0.08893
10	0.3	0.9	-1	1	0.03	0.04	0.2	0.9	10	1	30.531	0.01086
10	0.2	0.8	-1	1	0.03	0.04	0.2	0.7	10	1	29.789	0.02356
10	0.5	0.2	-1	1	0.03	0.04	0.8	0.1	10	1	35.049	0.06493
10	0.9	0.4	-1	1	0.03	0.04	0.8	0.4	10	1	37.771	0.05122
10	0.9	0.99	-1	1	0.03	0.04	0.04	0.4	10	1	242.25	0.10333
10	0.6	0.5	-1	1	0.03	0.04	0.2	0.3	10	1	45.389	0.09163
10	0.7	0.4	-1	1	0.03	0.04	0.2	0.2	10	1	44.77	0.0985
10	0.7	0.99	-1	1	0.03	0.04	0.04	0.8	10	1	81.496	0.04925
10	0.4	0.3	-1	1	0.03	0.04	0.8	0.3	10	1	35.424	0.0634
10	0.5	0.4	-1	1	0.03	0.04	0.2	0.2	10	1	42.28	0.09307
10	0.6	0.7	-1	1	0.03	0.04	0.2	0.5	10	1	50.077	0.07684
10	0.3	0.9	-1	1	0.03	0.04	0.2	0.8	10	1	32.196	0.01903
10	0.01	0.4	-1	1	0.03	0.04	0.2	0.1	10	1	38.718	0.09996
10	0.1	0.3	-1	1	0.03	0.04	0.8	0.3	10	1	35.05	0.06479
10	0.2	0.3	-1	1	0.03	0.04	0.8	0.3	10	1	35.11	0.06587
10	0.01	0.3	-1	1	0.03	0.04	0.8	0.2	10	1	36.464	0.07566
10	0.99	0.6	-1	1	0.03	0.04	0.2	0.4	10	1	65.888	0.11447
10	0.99	0.4	-1	1	0.03	0.04	0.8	0.6	10	1	38.095	0.05988
10	0.1	0.5	-1	1	0.03	0.04	0.2	0.3	10	1	36.116	0.0725
10	0.1	0.6	-1	1	0.03	0.04	0.2	0.4	10	1	34.133	0.05773
10	0.9	0.6	-1	1	0.03	0.04	0.2	0.4	10	1	60.771	0.105
10	0.3	0.1	-1	1	0.03	0.04	0.2	0	10	1	40.598	0.10508
10	0.4	0.5	-1	1	0.03	0.04	0.2	0.3	10	1	41.334	0.08453
10	0.5	0.8	-1	1	0.03	0.04	0.2	0.6	10	1	45.128	0.05639
10	0.5	0.3	-1	1	0.03	0.04	0.8	0.3	10	1	35.389	0.06222
10	0.3	0.4	-1	1	0.03	0.04	0.2	0.2	10	1	40.081	0.09049
10	0.4	0.9	-1	1	0.03	0.04	0.2	0.8	10	1	37.085	0.02517
10	0.99	0.1	-1	1	0.03	0.04	0.8	0	10	1	29.552	0.04831
10	0.4	0.7	-1	1	0.03	0.04	0.2	0.5	10	1	40.199	0.06334
10	0.8	0.5	-1	1	0.03	0.04	0.2	0.3	10	1	50.359	0.09972
10	0.4	0.9	-1	1	0.03	0.04	0.2	0.9	10	1	35.808	0.01725
10	0.7	0.9	-1	1	0.03	0.04	0.2	0.8	10	1	68.366	0.05638
10	0.6	0.4	-1	1	0.03	0.04	0.2	0.2	10	1	43.455	0.09561
10	0.3	0.8	-1	1	0.03	0.04	0.2	0.7	10	1	33.99	0.03199
10	0.5	0.7	-1	1	0.03	0.04	0.2	0.5	10	1	44.348	0.06825
10	0.4	0.6	-1	1	0.03	0.04	0.2	0.4	10	1	41.074	0.07376
10	0.5	0.1	-1	1	0.03	0.04	0.2	0	10	1	39.709	0.10172
10	0.4	0.8	-1	1	0.03	0.04	0.2	0.7	10	1	38.247	0.0392
10	0.2	0.3	-1	1	0.03	0.04	0.8	0.2	10	1	36.045	0.06809
10	0.99	0.4	-1	1	0.03	0.04	0.8	0.7	10	1	38.248	0.06634
10	0.2	0.4	-1	1	0.03	0.04	0.2	0.2	10	1	39.226	0.08778
10	0.4	0.4	-1	1	0.03	0.04	0.2	0.2	10	1	41.335	0.09237
10	0.99	0.4	-1	1	0.03	0.04	0.8	0.4	10	1	37.902	0.0473
10	0.4	0.5	-1	1	0.03	0.04	0.8	0.8	10	1	33.552	0.03998
10	0.3	0.7	-1	1	0.03	0.04	0.2	0.5	10	1	37.061	0.05563
10	0.4	0.4	-1	1	0.03	0.04	0.8	0.6	10	1	34.033	0.05102
10	0.99	0.2	-1	1	0.03	0.04	1.6	0.1	10	1	27.001	0.02068
10	0.6	0.8	-1	1	0.03	0.04	0.2	0.7	10	1	51.076	0.05796
10	0.2	0.7	-1	1	0.03	0.04	0.2	0.5	10	1	33.927	0.04944
10	0.01	0.1	-1	1	0.03	0.04	0.8	0	10	1	38.883	0.09486
10	0.4	0.1	-1	1	0.03	0.04	0.2	0	10	1	40.291	0.10328
10	0.7	0.4	-1	1	0.03	0.04	0.2	0.1	10	1	45.539	0.09657
10	0.7	0.7	-1	1	0.03	0.04	0.2	0.5	10	1	55.442	0.084
10	0.3	0.5	-1	1	0.03	0.04	0.2	0.3	10	1	39.201	0.08213
10	0.7	0.6	-1	1	0.03	0.04	0.2	0.4	10	1	51.186	0.08985
10	0.8	0.2	-1	1	0.03	0.04	1.6	0.1	10	1	29.391	0.033
10	0.9	0.2	-1	1	0.03	0.04	0.8	0.1	10	1	32.279	0.05002
10	0.5	0.8	-1	1	0.03	0.04	0.2	0.7	10	1	43.562	0.04807
10	0.5	0.9	-1	1	0.03	0.04	0.2	0.8	10	1	44.327	0.03291
10	0.3	0.6	-1	1	0.03	0.04	0.2	0.4	10	1	38.371	0.06839
10	0.9	0.2	-1	1	0.03	0.04	1.6	0.1	10	1	28.001	0.02658
10	0.6	0.8	-1	1	0.03	0.04	0.2	0.6	10	1	51.972	0.06549
10	0.9	0.3	-1	1	0.03	0.04	0.8	0.2	10	1	34.535	0.04725
10	0.9	0.1	-1	1	0.03	0.04	0.8	0	10	1	30.63	0.05304
10	0.99	0.2	-1	1	0.03	0.04	0.8	0.1	10	1	31.272	0.04476
10	0.99	0.3	-1	1	0.03	0.04	0.8	0.2	10	1	33.782	0.04358
10	0.8	0.6	-1	1	0.03	0.04	0.2	0.4	10	1	56.011	0.0989
10	0.7	0.2	-1	1	0.03	0.04	1.6	0.3	10	1	30.183	0.04029
10	0.6	0.5	-1	1	0.03	0.04	0.8	0.8	10	1	36.672	0.04972
10	0.5	0.4	-1	1	0.03	0.04	0.8	0.5	10	1	35.802	0.05638
10	0.3	0.2	-1	1	0.03	0.04	1.2	0.2	10	1	33.711	0.05981
10	0.6	0.2	-1	1	0.03	0.04	1.6	0.3	10	1	30.737	0.04505
10	0.8	0.1	-1	1	0.03	0.04	1.6	0	10	1	28.426	0.03834
10	0.9	0.2	-1	1	0.03	0.04	1.6	0.3	10	1	28.058	0.0329
10	0.1	0.4	-1	1	0.03	0.04	0.2	0.2	10	1	37.849	0.08602
10	0.8	0.99	-1	1	0.03	0.04	0.04	0.3	10	1	128.74	0.10083
10	0.5	0.5	-1	1	0.03	0.04	0.8	0.8	10	1	35.108	0.04427
10	0.8	0.3	-1	1	0.03	0.04	0.8	0.3	10	1	35.036	0.05686
10	0.2	0.5	-1	1	0.03	0.04	0.2	0.3	10	1	37.885	0.07785
10	0.9	0.7	-1	1	0.03	0.04	0.2	0.5	10	1	73.333	0.10422
10	0.9	0.3	-1	1	0.03	0.04	0.8	0.3	10	1	34.643	0.05163
10	0.8	0.3	-1	1	0.03	0.04	0.8	0.2	10	1	35.284	0.05313
10	0.1	0.1	-1	1	0.03	0.04	0.2	0	10	1	41.469	0.10652
10	0.6	0.2	-1	1	0.03	0.04	0.8	0.1	10	1	34.251	0.06082
10	0.6	0.1	-1	1	0.03	0.04	0.8	0	10	1	33.799	0.06603
10	0.99	0.3	-1	1	0.03	0.04	0.8	0.3	10	1	34.263	0.0501
10	0.5	0.4	-1	1	0.03	0.04	0.8	0.7	10	1	34.124	0.05278
10	0.8	0.7	-1	1	0.03	0.04	0.2	0.5	10	1	63.304	0.09253
10	0.6	0.3	-1	1	0.03	0.04	0.8	0.3	10	1	35.037	0.06028
10	0.7	0.3	-1	1	0.03	0.04	0.8	0.2	10	1	35.368	0.05747
10	0.1	0.3	-1	1	0.03	0.04	0.8	0.2	10	1	36.041	0.07108
10	0.01	0.1	-1	1	0.03	0.04	0.2	0	10	1	41.36	0.10939
10	0.8	0.4	-1	1	0.03	0.04	0.8	0.4	10	1	37.35	0.05303
10	0.6	0.3	-1	1	0.03	0.04	1.6	0.4	10	1	31.766	0.04064
10	0.99	0.4	-1	1	0.03	0.04	0.8	0.5	10	1	38.115	0.05481
10	0.6	0.9	-1	1	0.03	0.04	0.2	0.8	10	1	54.192	0.04319
10	0.8	0.3	-1	1	0.03	0.04	1.6	0.6	10	1	30.345	0.03729
10	0.2	0.2	-1	1	0.03	0.04	1.6	0.3	10	1	33.054	0.05404
10	0.1	0.1	-1	1	0.03	0.04	1.6	0	10	1	34.946	0.07109
10	0.9	0.8	-1	1	0.03	0.04	0.2	0.7	10	1	94.248	0.10408
10	0.8	0.99	-1	1	0.03	0.04	0.04	0.4	10	1	127.2	0.09389
10	0.6	0.9	-1	1	0.03	0.04	0.2	0.9	10	1	52.795	0.03608
10	0.9	0.5	-1	1	0.03	0.04	0.2	0.3	10	1	52.687	0.10433
10	0.4	0.3	-1	1	0.03	0.04	0.8	0.2	10	1	36.144	0.06482
10	0.3	0.3	-1	1	0.03	0.04	0.8	0.3	10	1	35.327	0.06246
10	0.1	0.4	-1	1	0.03	0.04	0.8	0.7	10	1	31.126	0.03374
10	0.99	0.1	-1	1	0.03	0.04	1.2	0	10	1	27.647	0.03656
10	0.99	0.1	-1	1	0.03	0.04	2	0	10	1	25.03	0.02321
10	0.99	0.3	-1	1	0.03	0.04	1.2	0.4	10	1	31.471	0.03461
10	0.7	0.4	-1	1	0.03	0.04	0.8	0.4	10	1	37.519	0.05664
10	0.4	0.4	-1	1	0.03	0.04	0.8	0.5	10	1	34.999	0.054
10	0.99	0.2	-1	1	0.03	0.04	1.2	0.2	10	1	29.001	0.03316
10	0.6	0.4	-1	1	0.03	0.04	1.6	0.8	10	1	31.602	0.0354
10	0.9	0.2	-1	1	0.03	0.04	1.2	0.1	10	1	29.732	0.03476
10	0.99	0.2	-1	1	0.03	0.04	1.2	0.1	10	1	28.742	0.02971
10	0.9	0.4	-1	1	0.03	0.04	0.8	0.6	10	1	37.473	0.06137
10	0.6	0.4	-1	1	0.03	0.04	0.8	0.5	10	1	36	0.05642
10	0.9	0.4	-1	1	0.03	0.04	0.8	0.7	10	1	37.232	0.0648
10	0.99	0.2	-1	1	0.03	0.04	1.6	0.3	10	1	27.45	0.02753
10	0.6	0.4	-1	1	0.03	0.04	0.8	0.4	10	1	36.731	0.05637
10	0.9	0.4	-1	1	0.03	0.04	0.8	0.5	10	1	37.873	0.05709
10	0.7	0.4	-1	1	0.03	0.04	0.8	0.5	10	1	36.91	0.05789
10	0.99	0.1	-1	1	0.03	0.04	1.6	0	10	1	26.054	0.02793
10	0.5	0.4	-1	1	0.03	0.04	1.6	0.8	10	1	31.654	0.03563
10	0.7	0.8	-1	1	0.03	0.04	0.2	0.7	10	1	60.713	0.07135
10	0.4	0.4	-1	1	0.03	0.04	0.8	0.4	10	1	35.751	0.05806
10	0.99	0.2	-1	1	0.03	0.04	2	0.1	10	1	25.905	0.01565
10	0.99	0.4	-1	1	0.03	0.04	1.2	0.8	10	1	34.923	0.04358
10	0.99	0.2	-1	1	0.03	0.04	1.6	0.2	10	1	27.258	0.02398
10	0.9	0.3	-1	1	0.03	0.04	1.6	0.4	10	1	29.906	0.02794
10	0.9	0.99	-1	1	0.03	0.04	0.04	0.2	10	1	246.35	0.11309
10	0.99	0.3	-1	1	0.03	0.04	1.6	0.4	10	1	29.374	0.02208
10	0.8	0.4	-1	1	0.03	0.04	0.8	0.6	10	1	37.543	0.06063
10	0.01	0.3	-1	1	0.03	0.04	1.6	0.4	10	1	33.438	0.05562
10	0.2	0.4	-1	1	0.03	0.04	0.8	0.5	10	1	33.369	0.05057
10	0.8	0.4	-1	1	0.03	0.04	0.2	0.1	10	1	46.081	0.0952
10	0.9	0.2	-1	1	0.03	0.04	1.2	0.2	10	1	29.853	0.03945
10	0.9	0.1	-1	1	0.03	0.04	1.6	0	10	1	27.264	0.03336
10	0.9	0.1	-1	1	0.03	0.04	2	0	10	1	26.144	0.02805
10	0.9	0.3	-1	1	0.03	0.04	1.2	0.5	10	1	32.086	0.04351
10	0.9	0.2	-1	1	0.03	0.04	1.6	0.2	10	1	28.192	0.02989
10	0.5	0.1	-1	1	0.03	0.04	0.8	0	10	1	34.946	0.0713
10	0.1	0.2	-1	1	0.03	0.04	1.6	0.3	10	1	33.483	0.0568
10	0.9	0.3	-1	1	0.03	0.04	1.2	0.4	10	1	32.027	0.03909
10	0.8	0.4	-1	1	0.03	0.04	0.8	0.7	10	1	36.998	0.06445
10	0.8	0.4	-1	1	0.03	0.04	0.8	0.5	10	1	37.489	0.05708
10	0.7	0.4	-1	1	0.03	0.04	0.8	0.6	10	1	36.542	0.05956
10	0.2	0.5	-1	1	0.03	0.04	0.8	0.9	10	1	29.805	0.02342
10	0.1	0.4	-1	1	0.03	0.04	1.6	0.8	10	1	29.911	0.03029
10	0.99	0.4	-1	1	0.03	0.04	1.6	0.9	10	1	32.671	0.02996
10	0.8	0.2	-1	1	0.03	0.04	1.2	0.2	10	1	30.782	0.04521
10	0.7	0.8	-1	1	0.03	0.04	0.2	0.6	10	1	61.272	0.07436
10	0.3	0.4	-1	1	0.03	0.04	0.8	0.6	10	1	33.483	0.04924
10	0.01	0.5	-1	1	0.03	0.04	0.8	0.9	10	1	26.406	0.00696
10	0.6	0.3	-1	1	0.03	0.04	0.8	0.2	10	1	35.797	0.05965
10	0.5	0.4	-1	1	0.03	0.04	0.8	0.4	10	1	36.379	0.05867
10	0.6	0.2	-1	1	0.03	0.04	1.6	0.1	10	1	30.875	0.04031
10	0.7	0.5	-1	1	0.03	0.04	0.8	0.8	10	1	38.358	0.05347
10	0.2	0.4	-1	1	0.03	0.04	0.8	0.4	10	1	34.267	0.05704
10	0.99	0.4	-1	1	0.03	0.04	1.2	0.7	10	1	34.863	0.03826
10	0.6	0.5	-1	1	0.03	0.04	0.8	0.9	10	1	35.914	0.04649
10	0.1	0.5	-1	1	0.03	0.04	0.8	0.9	10	1	28.441	0.01669
10	0.99	0.3	-1	1	0.03	0.04	1.2	0.5	10	1	31.285	0.03952
10	0.8	0.99	-1	1	0.03	0.04	0.04	0.5	10	1	126.37	0.08516
10	0.3	0.2	-1	1	0.03	0.04	0.8	0.1	10	1	36.075	0.07189
10	0.8	0.3	-1	1	0.03	0.04	1.2	0.4	10	1	32.47	0.04326
10	0.7	0.3	-1	1	0.03	0.04	1.2	0.5	10	1	32.532	0.04824
10	0.9	0.4	-1	1	0.03	0.04	1.2	0.7	10	1	34.565	0.04338
10	0.7	0.4	-1	1	0.03	0.04	0.8	0.7	10	1	36.245	0.06045
10	0.8	0.1	-1	1	0.03	0.04	2	0	10	1	27.511	0.03309
10	0.7	0.2	-1	1	0.03	0.04	0.8	0.1	10	1	33.801	0.05952
10	0.01	0.4	-1	1	0.03	0.04	1.6	0.9	10	1	29.068	0.01928
10	0.7	0.2	-1	1	0.03	0.04	1.6	0.1	10	1	30.314	0.0372
10	0.9	0.4	-1	1	0.03	0.04	1.2	0.9	10	1	34.421	0.04851
10	0.1	0.1	-1	1	0.03	0.04	0.8	0	10	1	37.504	0.08393
10	0.7	0.4	-1	1	0.03	0.04	1.2	0.8	10	1	33.795	0.04712
10	0.2	0.4	-1	1	0.03	0.04	0.8	0.7	10	1	31.952	0.03953
10	0.9	0.1	-1	1	0.03	0.04	1.2	0	10	1	28.591	0.04091
10	0.8	0.3	-1	1	0.03	0.04	1.2	0.5	10	1	32.222	0.04603
10	0.5	0.5	-1	1	0.03	0.04	0.8	0.9	10	1	34.283	0.04328
10	0.2	0.4	-1	1	0.03	0.04	0.8	0.6	10	1	32.93	0.04548
10	0.3	0.5	-1	1	0.03	0.04	0.8	0.8	10	1	32.248	0.0341
10	0.4	0.1	-1	1	0.03	0.04	0.8	0	10	1	35.426	0.07433
10	0.3	0.3	-1	1	0.03	0.04	0.8	0.2	10	1	35.823	0.06532
10	0.3	0.4	-1	1	0.03	0.04	0.8	0.4	10	1	35.066	0.05595
10	0.8	0.99	-1	1	0.03	0.04	0.04	0.7	10	1	124.5	0.07199
10	0.8	0.2	-1	1	0.03	0.04	1.6	0.2	10	1	29.255	0.03421
10	0.5	0.4	-1	1	0.03	0.04	0.8	0.6	10	1	34.968	0.05485
10	0.01	0.4	-1	1	0.03	0.04	1.2	0.9	10	1	28.332	0.01371
10	0.01	0.4	-1	1	0.03	0.04	0.8	0.5	10	1	32.236	0.04283
10	0.2	0.1	-1	1	0.03	0.04	0.8	0	10	1	36.795	0.08122
10	0.3	0.4	-1	1	0.03	0.04	1.2	0.9	10	1	30.319	0.0332
10	0.1	0.4	-1	1	0.03	0.04	1.2	0.9	10	1	29.159	0.02362
10	0.6	0.2	-1	1	0.03	0.04	2	0.1	10	1	30.112	0.03678
10	0.99	0.3	-1	1	0.03	0.04	1.2	0.3	10	1	31.019	0.03055
10	0.2	0.2	-1	1	0.03	0.04	0.8	0.1	10	1	36.232	0.07363
10	0.1	0.5	-1	1	0.03	0.04	0.8	0.8	10	1	29.472	0.02357
10	0.3	0.5	-1	1	0.03	0.04	0.8	0.9	10	1	31.277	0.02932
10	0.8	0.1	-1	1	0.03	0.04	1.2	0	10	1	29.85	0.0462
10	0.9	0.4	-1	1	0.03	0.04	1.2	0.8	10	1	34.658	0.04576
10	0.4	0.4	-1	1	0.03	0.04	1.2	0.9	10	1	31.176	0.03692
10	0.8	0.2	-1	1	0.03	0.04	1.6	0.3	10	1	29.04	0.03729
10	0.6	0.3	-1	1	0.03	0.04	1.2	0.5	10	1	32.603	0.04845
10	0.5	0.2	-1	1	0.03	0.04	1.6	0.3	10	1	31.569	0.04782
10	0.6	0.4	-1	1	0.03	0.04	0.8	0.6	10	1	35.849	0.05668
10	0.99	0.2	-1	1	0.03	0.04	2	0.5	10	1	26.248	0.02629
10	0.99	0.3	-1	1	0.03	0.04	1.2	0.6	10	1	31.483	0.04493
10	0.99	0.3	-1	1	0.03	0.04	1.6	0.6	10	1	29.694	0.02969
10	0.7	0.1	-1	1	0.03	0.04	1.6	0	10	1	29.411	0.0427
10	0.2	0.5	-1	1	0.03	0.04	0.8	0.8	10	1	30.649	0.02974
10	0.7	0.5	-1	1	0.03	0.04	0.8	0.9	10	1	37.997	0.05486
10	0.4	0.5	-1	1	0.03	0.04	0.8	0.9	10	1	32.973	0.03664
10	0.6	0.4	-1	1	0.03	0.04	1.2	0.8	10	1	32.909	0.04407
10	0.5	0.4	-1	1	0.03	0.04	1.2	0.8	10	1	32.406	0.04219
10	0.8	0.4	-1	1	0.03	0.04	1.2	0.7	10	1	34.219	0.04344
10	0.2	0.4	-1	1	0.03	0.04	1.2	0.9	10	1	29.679	0.0293
10	0.8	0.4	-1	1	0.03	0.04	1.2	0.8	10	1	34.088	0.04645
10	0.9	0.3	-1	1	0.03	0.04	1.2	0.3	10	1	31.917	0.0355
10	0.8	0.2	-1	1	0.03	0.04	1.2	0.1	10	1	30.843	0.04067
10	0.1	0.4	-1	1	0.03	0.04	0.8	0.5	10	1	32.86	0.04892
10	0.99	0.3	-1	1	0.03	0.04	2	0.7	10	1	28.04	0.02196
10	0.9	0.3	-1	1	0.03	0.04	2	0.6	10	1	28.638	0.02426
10	0.7	0.4	-1	1	0.03	0.04	1.2	0.7	10	1	34.042	0.04549
10	0.8	0.3	-1	1	0.03	0.04	1.6	0.4	10	1	30.852	0.03255
10	0.4	0.3	-1	1	0.03	0.04	1.6	0.4	10	1	32.384	0.04482
10	0.7	0.9	-1	1	0.03	0.04	0.2	0.9	10	1	67.255	0.05118
10	0.6	0.2	-1	1	0.03	0.04	2	0.4	10	1	29.672	0.03824
10	0.01	0.4	-1	1	0.03	0.04	0.8	0.4	10	1	33.647	0.05458
10	0.6	0.1	-1	1	0.03	0.04	1.6	0	10	1	30.763	0.04817
10	0.4	0.2	-1	1	0.03	0.04	1.6	0.3	10	1	31.841	0.04922
10	0.01	0.5	-1	1	0.03	0.04	0.8	0.8	10	1	27.847	0.01393
10	0.01	0.4	-1	1	0.03	0.04	0.8	0.6	10	1	30.924	0.03317
10	0.6	0.2	-1	1	0.03	0.04	1.2	0.1	10	1	32.821	0.05096
10	0.7	0.3	-1	1	0.03	0.04	1.2	0.4	10	1	32.855	0.04573
10	0.8	0.3	-1	1	0.03	0.04	1.6	0.5	10	1	30.492	0.03496
10	0.6	0.4	-1	1	0.03	0.04	0.8	0.7	10	1	35.568	0.05619
10	0.99	0.4	-1	1	0.03	0.04	1.2	0.9	10	1	35.028	0.04879
10	0.4	0.2	-1	1	0.03	0.04	2	0.4	10	1	30.409	0.04303
10	0.1	0.2	-1	1	0.03	0.04	2	0.1	10	1	33.756	0.05979
10	0.5	0.2	-1	1	0.03	0.04	1.2	0.2	10	1	32.929	0.05387
10	0.6	0.3	-1	1	0.03	0.04	1.2	0.4	10	1	32.906	0.04862
10	0.5	0.3	-1	1	0.03	0.04	0.8	0.2	10	1	35.895	0.06299
10	0.7	0.2	-1	1	0.03	0.04	1.2	0.1	10	1	31.746	0.04582
10	0.5	0.3	-1	1	0.03	0.04	1.2	0.5	10	1	32.688	0.04989
10	0.5	0.2	-1	1	0.03	0.04	1.2	0.1	10	1	33.286	0.05302
10	0.9	0.5	-1	1	0.03	0.04	0.8	0.8	10	1	42.152	0.05964
10	0.3	0.3	-1	1	0.03	0.04	1.2	0.6	10	1	32.199	0.04789
10	0.7	0.2	-1	1	0.03	0.04	2	0.4	10	1	28.806	0.03643
10	0.99	0.5	-1	1	0.03	0.04	0.8	0.9	10	1	43.841	0.06955
10	0.4	0.3	-1	1	0.03	0.04	1.2	0.6	10	1	32.257	0.04832
10	0.01	0.4	-1	1	0.03	0.04	1.2	0.7	10	1	30.239	0.02838
10	0.3	0.4	-1	1	0.03	0.04	0.8	0.7	10	1	32.718	0.04446
10	0.3	0.4	-1	1	0.03	0.04	1.2	0.7	10	1	32.074	0.03952
10	0.3	0.1	-1	1	0.03	0.04	0.8	0	10	1	36.387	0.0771
10	0.9	0.3	-1	1	0.03	0.04	1.2	0.6	10	1	31.957	0.04804
10	0.4	0.4	-1	1	0.03	0.04	1.2	0.8	10	1	31.598	0.0393
10	0.2	0.3	-1	1	0.03	0.04	1.2	0.6	10	1	31.795	0.04479
10	0.4	0.4	-1	1	0.03	0.04	1.2	0.7	10	1	32.491	0.04179
10	0.9	0.3	-1	1	0.03	0.04	1.6	0.6	10	1	30.058	0.03394
10	0.6	0.2	-1	1	0.03	0.04	2	0.2	10	1	29.791	0.03672
10	0.8	0.99	-1	1	0.03	0.04	0.04	0.6	10	1	125.15	0.07754
10	0.01	0.5	-1	1	0.03	0.04	0.2	0.3	10	1	34.404	0.0647
10	0.6	0.2	-1	1	0.03	0.04	1.6	0.2	10	1	30.994	0.04243
10	0.3	0.4	-1	1	0.03	0.04	1.2	0.8	10	1	31.172	0.03612
10	0.1	0.4	-1	1	0.03	0.04	0.8	0.6	10	1	31.849	0.04021
10	0.7	0.3	-1	1	0.03	0.04	1.6	0.6	10	1	31.022	0.03758
10	0.3	0.3	-1	1	0.03	0.04	1.2	0.4	10	1	33.265	0.05332
10	0.8	0.3	-1	1	0.03	0.04	1.2	0.6	10	1	32.051	0.04833
10	0.4	0.2	-1	1	0.03	0.04	1.2	0.2	10	1	33.476	0.05701
10	0.7	0.1	-1	1	0.03	0.04	1.2	0	10	1	30.894	0.05177
10	0.8	0.3	-1	1	0.03	0.04	1.2	0.3	10	1	32.521	0.04017
10	0.99	0.5	-1	1	0.03	0.04	0.8	0.8	10	1	43.806	0.06177
10	0.4	0.3	-1	1	0.03	0.04	2	0.7	10	1	30.141	0.03688
10	0.4	0.2	-1	1	0.03	0.04	1.2	0.1	10	1	33.942	0.05662
10	0.3	0.3	-1	1	0.03	0.04	2	0.7	10	1	30.516	0.03907
10	0.5	0.3	-1	1	0.03	0.04	1.2	0.4	10	1	32.928	0.04844
10	0.99	0.3	-1	1	0.03	0.04	2	0.6	10	1	27.995	0.01947
10	0.9	0.3	-1	1	0.03	0.04	1.6	0.5	10	1	30.054	0.03099
10	0.4	0.3	-1	1	0.03	0.04	1.2	0.3	10	1	33.8	0.05197
10	0.3	0.3	-1	1	0.03	0.04	1.2	0.5	10	1	32.968	0.04935
10	0.3	0.3	-1	1	0.03	0.04	1.2	0.3	10	1	33.728	0.05454
10	0.1	0.2	-1	1	0.03	0.04	0.8	0.1	10	1	36.945	0.07721
10	0.9	0.3	-1	1	0.03	0.04	2	0.9	10	1	28.684	0.03259
10	0.01	0.4	-1	1	0.03	0.04	0.8	0.7	10	1	29.828	0.02475
10	0.5	0.3	-1	1	0.03	0.04	1.2	0.6	10	1	32.173	0.04884
10	0.2	0.3	-1	1	0.03	0.04	1.2	0.4	10	1	33.514	0.05357
10	0.8	0.8	-1	1	0.03	0.04	0.2	0.6	10	1	74.234	0.08755
10	0.1	0.2	-1	1	0.03	0.04	1.6	0.1	10	1	34.427	0.06448
10	0.4	0.3	-1	1	0.03	0.04	1.2	0.4	10	1	33.47	0.05105
10	0.7	0.3	-1	1	0.03	0.04	1.2	0.3	10	1	32.891	0.04463
10	0.3	0.2	-1	1	0.03	0.04	1.2	0.1	10	1	34.25	0.06081
10	0.6	0.4	-1	1	0.03	0.04	1.2	0.7	10	1	33.486	0.04462
10	0.2	0.4	-1	1	0.03	0.04	1.2	0.7	10	1	31.275	0.03752
10	0.5	0.4	-1	1	0.03	0.04	1.2	0.7	10	1	32.974	0.04383
10	0.6	0.1	-1	1	0.03	0.04	1.2	0	10	1	32.047	0.05478
10	0.3	0.4	-1	1	0.03	0.04	0.8	0.5	10	1	34.154	0.054
10	0.6	0.4	-1	1	0.03	0.04	1.2	0.9	10	1	32.577	0.04541
10	0.5	0.2	-1	1	0.03	0.04	1.6	0.1	10	1	31.99	0.04539
10	0.1	0.3	-1	1	0.03	0.04	1.2	0.6	10	1	31.832	0.04309
10	0.99	0.4	-1	1	0.03	0.04	1.6	0.7	10	1	32.371	0.02423
10	0.5	0.3	-1	1	0.03	0.04	1.6	0.4	10	1	31.942	0.04264
10	0.4	0.2	-1	1	0.03	0.04	1.6	0.2	10	1	32.194	0.05057
10	0.9	0.2	-1	1	0.03	0.04	2	0.2	10	1	27.005	0.02314
10	0.5	0.1	-1	1	0.03	0.04	1.6	0	10	1	31.465	0.05065
10	0.2	0.3	-1	1	0.03	0.04	2	0.7	10	1	30.273	0.03712
10	0.1	0.3	-1	1	0.03	0.04	2	0.7	10	1	30.579	0.0386
10	0.99	0.4	-1	1	0.03	0.04	1.6	0.8	10	1	32.717	0.0273
10	0.5	0.1	-1	1	0.03	0.04	2	0	10	1	30.783	0.04756
10	0.1	0.3	-1	1	0.03	0.04	1.2	0.4	10	1	33.06	0.05474
10	0.2	0.2	-1	1	0.03	0.04	1.2	0.1	10	1	35.118	0.06567
10	0.7	0.4	-1	1	0.03	0.04	1.2	0.9	10	1	33.4	0.04667
10	0.8	0.9	-1	1	0.03	0.04	0.2	0.9	10	1	90.92	0.06997
10	0.01	0.3	-1	1	0.03	0.04	0.8	0.3	10	1	35.098	0.06488
10	0.1	0.3	-1	1	0.03	0.04	1.6	0.5	10	1	31.821	0.04643
10	0.01	0.2	-1	1	0.03	0.04	0.8	0.1	10	1	38.099	0.08469
10	0.5	0.3	-1	1	0.03	0.04	2	0.6	10	1	30.508	0.03614
10	0.8	0.5	-1	1	0.03	0.04	0.8	0.9	10	1	40.022	0.06116
10	0.01	0.4	-1	1	0.03	0.04	1.6	0.7	10	1	30.787	0.03327
10	0.9	0.5	-1	1	0.03	0.04	0.8	0.9	10	1	42.025	0.06663
10	0.1	0.3	-1	1	0.03	0.04	1.6	0.4	10	1	32.597	0.04988
10	0.01	0.4	-1	1	0.03	0.04	1.2	0.8	10	1	29.328	0.02096
10	0.5	0.3	-1	1	0.03	0.04	1.6	0.5	10	1	31.802	0.04255
10	0.9	0.4	-1	1	0.03	0.04	1.6	0.7	10	1	32.474	0.0285
10	0.9	0.4	-1	1	0.03	0.04	1.6	0.8	10	1	32.647	0.03162
10	0.9	0.3	-1	1	0.03	0.04	2	0.7	10	1	28.609	0.02724
10	0.1	0.2	-1	1	0.03	0.04	1.2	0.1	10	1	35.395	0.06975
10	0.4	0.2	-1	1	0.03	0.04	1.6	0.1	10	1	32.852	0.051
10	0.2	0.2	-1	1	0.03	0.04	1.6	0.2	10	1	33.2	0.05497
10	0.8	0.4	-1	1	0.03	0.04	1.6	0.8	10	1	32.558	0.03374
10	0.4	0.1	-1	1	0.03	0.04	1.6	0	10	1	32.495	0.05687
10	0.4	0.3	-1	1	0.03	0.04	1.2	0.5	10	1	32.85	0.05136
10	0.5	0.1	-1	1	0.03	0.04	1.2	0	10	1	32.741	0.05833
10	0.6	0.3	-1	1	0.03	0.04	1.2	0.3	10	1	33.386	0.04785
10	0.8	0.2	-1	1	0.03	0.04	2	0.2	10	1	28.224	0.02766
10	0.7	0.4	-1	1	0.03	0.04	1.6	0.8	10	1	31.971	0.03422
10	0.8	0.2	-1	1	0.03	0.04	2	0.1	10	1	27.963	0.0262
10	0.3	0.1	-1	1	0.03	0.04	1.6	0	10	1	33.396	0.0598
10	0.8	0.8	-1	1	0.03	0.04	0.2	0.7	10	1	74.256	0.08467
10	0.01	0.3	-1	1	0.03	0.04	1.2	0.3	10	1	34.509	0.0621
10	0.3	0.1	-1	1	0.03	0.04	1.2	0	10	1	34.483	0.06736
10	0.01	0.3	-1	1	0.03	0.04	1.6	0.5	10	1	32.755	0.0491
10	0.99	0.2	-1	1	0.03	0.04	2	0.2	10	1	25.919	0.01822
10	0.99	0.2	-1	1	0.03	0.04	2	0.3	10	1	26.072	0.02087
10	0.6	0.4	-1	1	0.03	0.04	1.6	0.9	10	1	31.264	0.0354
10	0.5	0.3	-1	1	0.03	0.04	1.2	0.3	10	1	33.742	0.05051
10	0.3	0.2	-1	1	0.03	0.04	1.6	0.1	10	1	33.478	0.05529
10	0.4	0.3	-1	1	0.03	0.04	2	0.8	10	1	29.788	0.03641
10	0.5	0.4	-1	1	0.03	0.04	1.6	0.9	10	1	30.894	0.03444
10	0.01	0.3	-1	1	0.03	0.04	1.2	0.6	10	1	31.913	0.04033
10	0.7	0.4	-1	1	0.03	0.04	1.6	0.7	10	1	32.175	0.03443
10	0.2	0.3	-1	1	0.03	0.04	1.2	0.3	10	1	33.946	0.0567
10	0.2	0.1	-1	1	0.03	0.04	1.6	0	10	1	33.986	0.0649
10	0.2	0.3	-1	1	0.03	0.04	1.6	0.4	10	1	32.614	0.04879
10	0.5	0.2	-1	1	0.03	0.04	1.6	0.2	10	1	31.67	0.04728
10	0.1	0.2	-1	1	0.03	0.04	1.6	0.2	10	1	34.072	0.06033
10	0.6	0.3	-1	1	0.03	0.04	1.6	0.6	10	1	31.219	0.04098
10	0.9	0.2	-1	1	0.03	0.04	2	0.1	10	1	27.034	0.0213
10	0.9	0.4	-1	1	0.03	0.04	1.6	0.9	10	1	32.35	0.03312
10	0.4	0.1	-1	1	0.03	0.04	1.2	0	10	1	33.947	0.06329
10	0.1	0.3	-1	1	0.03	0.04	1.2	0.5	10	1	32.606	0.04895
10	0.99	0.2	-1	1	0.03	0.04	2	0.4	10	1	26.173	0.02364
10	0.01	0.3	-1	1	0.03	0.04	2	0.7	10	1	31.164	0.03681
10	0.2	0.2	-1	1	0.03	0.04	2	0.4	10	1	31.552	0.04768
10	0.3	0.4	-1	1	0.03	0.04	1.6	0.7	10	1	31.356	0.03816
10	0.01	0.2	-1	1	0.03	0.04	1.2	0.1	10	1	36.659	0.07871
10	0.8	0.4	-1	1	0.03	0.04	1.6	0.9	10	1	32.287	0.03569
10	0.99	0.3	-1	1	0.03	0.04	1.6	0.5	10	1	29.503	0.02617
10	0.99	0.3	-1	1	0.03	0.04	2	0.9	10	1	28.42	0.02838
10	0.1	0.3	-1	1	0.03	0.04	1.2	0.3	10	1	33.986	0.0591
10	0.8	0.4	-1	1	0.03	0.04	1.6	0.7	10	1	32.438	0.03214
10	0.3	0.3	-1	1	0.03	0.04	1.6	0.5	10	1	31.876	0.04389
10	0.7	0.3	-1	1	0.03	0.04	1.6	0.4	10	1	31.235	0.03583
10	0.3	0.3	-1	1	0.03	0.04	1.6	0.4	10	1	32.135	0.04738
10	0.3	0.2	-1	1	0.03	0.04	1.6	0.2	10	1	32.772	0.05309
10	0.2	0.3	-1	1	0.03	0.04	1.2	0.5	10	1	32.611	0.04962
10	0.01	0.3	-1	1	0.03	0.04	1.2	0.5	10	1	32.914	0.04658
10	0.4	0.4	-1	1	0.03	0.04	1.6	0.7	10	1	31.695	0.03739
10	0.9	0.2	-1	1	0.03	0.04	2	0.5	10	1	27.274	0.03089
10	0.7	0.4	-1	1	0.03	0.04	1.6	0.9	10	1	32.036	0.03649
10	0.01	0.2	-1	1	0.03	0.04	2	0.3	10	1	34.141	0.06214
10	0.3	0.4	-1	1	0.03	0.04	1.6	0.8	10	1	30.637	0.03408
10	0.7	0.2	-1	1	0.03	0.04	1.6	0.2	10	1	29.942	0.03954
10	0.7	0.1	-1	1	0.03	0.04	2	0	10	1	28.283	0.03788
10	0.9	0.2	-1	1	0.03	0.04	2	0.4	10	1	27.012	0.02764
10	0.2	0.4	-1	1	0.03	0.04	1.6	0.8	10	1	30.129	0.03281
10	0.4	0.3	-1	1	0.03	0.04	1.6	0.6	10	1	31.308	0.04182
10	0.4	0.4	-1	1	0.03	0.04	1.6	0.9	10	1	30.626	0.03468
10	0.3	0.3	-1	1	0.03	0.04	1.6	0.6	10	1	31.364	0.0426
10	0.1	0.2	-1	1	0.03	0.04	2	0.5	10	1	31.861	0.048
10	0.1	0.4	-1	1	0.03	0.04	0.8	0.4	10	1	33.924	0.05598
10	0.5	0.4	-1	1	0.03	0.04	1.6	0.7	10	1	31.873	0.03707
10	0.8	0.2	-1	1	0.03	0.04	2	0.4	10	1	28.176	0.0326
10	0.3	0.2	-1	1	0.03	0.04	2	0.4	10	1	31.142	0.04629
10	0.01	0.3	-1	1	0.03	0.04	1.2	0.4	10	1	33.778	0.05561
10	0.8	0.2	-1	1	0.03	0.04	2	0.3	10	1	27.989	0.03069
10	0.1	0.3	-1	1	0.03	0.04	1.6	0.6	10	1	31.391	0.04231
10	0.7	0.2	-1	1	0.03	0.04	2	0.2	10	1	29.091	0.03234
10	0.7	0.3	-1	1	0.03	0.04	1.6	0.5	10	1	31.007	0.03838
10	0.01	0.3	-1	1	0.03	0.04	1.6	0.6	10	1	31.754	0.04062
10	0.3	0.4	-1	1	0.03	0.04	1.6	0.9	10	1	30.263	0.03188
10	0.2	0.4	-1	1	0.03	0.04	1.6	0.9	10	1	29.602	0.03029
10	0.6	0.4	-1	1	0.03	0.04	1.6	0.7	10	1	32.281	0.0367
10	0.7	0.2	-1	1	0.03	0.04	1.2	0.2	10	1	31.458	0.04774
10	0.4	0.4	-1	1	0.03	0.04	0.2	0.1	10	1	42.494	0.09699
10	0.7	0.3	-1	1	0.03	0.04	2	0.8	10	1	29.297	0.0343
10	0.1	0.1	-1	1	0.03	0.04	1.2	0	10	1	36.194	0.07599
10	0.9	0.8	-1	1	0.03	0.04	0.2	0.6	10	1	94.652	0.1009
10	0.8	0.9	-1	1	0.03	0.04	0.2	0.8	10	1	90.912	0.07299
10	0.2	0.4	-1	1	0.03	0.04	1.6	0.7	10	1	30.872	0.03721
10	0.6	0.2	-1	1	0.03	0.04	1.2	0.2	10	1	32.388	0.05241
10	0.1	0.2	-1	1	0.03	0.04	1.2	0.2	10	1	35.137	0.06557
10	0.7	0.3	-1	1	0.03	0.04	0.8	0.3	10	1	35.49	0.05988
10	0.7	0.3	-1	1	0.03	0.04	1.2	0.6	10	1	32.364	0.04874
10	0.99	0.9	-1	1	0.03	0.04	0.2	0.8	10	1	231.58	0.1198
10	0.7	0.3	-1	1	0.03	0.04	2	0.6	10	1	29.764	0.03143
10	0.8	0.3	-1	1	0.03	0.04	2	0.6	10	1	29.139	0.02872
10	0.8	0.3	-1	1	0.03	0.04	2	0.7	10	1	29.13	0.03147
10	0.3	0.3	-1	1	0.03	0.04	2	0.9	10	1	29.094	0.03402
10	0.01	0.2	-1	1	0.03	0.04	1.2	0.2	10	1	35.95	0.07162
10	0.99	0.8	-1	1	0.03	0.04	0.2	0.6	10	1	122.81	0.11558
10	0.01	0.4	-1	1	0.03	0.04	1.6	0.8	10	1	29.87	0.02578
10	0.6	0.3	-1	1	0.03	0.04	1.2	0.6	10	1	32.342	0.05047
10	0.2	0.2	-1	1	0.03	0.04	1.6	0.1	10	1	33.73	0.06016
10	0.99	0.3	-1	1	0.03	0.04	2	0.8	10	1	28.313	0.02492
10	0.8	0.3	-1	1	0.03	0.04	2	0.8	10	1	29.187	0.0327
10	0.5	0.2	-1	1	0.03	0.04	2	0.1	10	1	30.902	0.04051
10	0.01	0.2	-1	1	0.03	0.04	1.6	0.3	10	1	34.385	0.06215
10	0.6	0.3	-1	1	0.03	0.04	2	0.7	10	1	29.814	0.03498
10	0.6	0.2	-1	1	0.03	0.04	2	0.5	10	1	29.425	0.0402
10	0.2	0.1	-1	1	0.03	0.04	1.2	0	10	1	35.538	0.07185
10	0.6	0.3	-1	1	0.03	0.04	2	0.6	10	1	30.016	0.03404
10	0.4	0.2	-1	1	0.03	0.04	0.8	0.1	10	1	35.724	0.06935
10	0.8	0.3	-1	1	0.03	0.04	2	0.9	10	1	29.015	0.03391
10	0.5	0.2	-1	1	0.03	0.04	2	0.5	10	1	29.961	0.04209
10	0.01	0.1	-1	1	0.03	0.04	1.2	0	10	1	37.825	0.08787
10	0.1	0.4	-1	1	0.03	0.04	1.6	0.7	10	1	30.629	0.03455
10	0.01	0.2	-1	1	0.03	0.04	1.6	0.2	10	1	35.351	0.06895
10	0.7	0.3	-1	1	0.03	0.04	2	0.7	10	1	29.795	0.03236
10	0.01	0.2	-1	1	0.03	0.04	2	0.1	10	1	35.42	0.07291
10	0.9	0.3	-1	1	0.03	0.04	2	0.8	10	1	28.788	0.0311
10	0.6	0.3	-1	1	0.03	0.04	1.6	0.5	10	1	31.249	0.03901
10	0.5	0.3	-1	1	0.03	0.04	2	0.8	10	1	29.924	0.03571
10	0.01	0.2	-1	1	0.03	0.04	1.6	0.1	10	1	35.997	0.07517
10	0.4	0.3	-1	1	0.03	0.04	1.6	0.5	10	1	31.675	0.04349
10	0.7	0.3	-1	1	0.03	0.04	2	0.9	10	1	29.191	0.03595
10	0.7	0.2	-1	1	0.03	0.04	2	0.3	10	1	28.757	0.03368
10	0.4	0.3	-1	1	0.03	0.04	2	0.6	10	1	30.534	0.03866
10	0.5	0.2	-1	1	0.03	0.04	2	0.4	10	1	30.173	0.04194
10	0.2	0.3	-1	1	0.03	0.04	1.6	0.5	10	1	32.019	0.04552
10	0.6	0.3	-1	1	0.03	0.04	2	0.8	10	1	29.57	0.03512
10	0.99	0.8	-1	1	0.03	0.04	0.2	0.7	10	1	122.53	0.12247
10	0.3	0.3	-1	1	0.03	0.04	2	0.8	10	1	29.751	0.03536
10	0.2	0.2	-1	1	0.03	0.04	2	0.2	10	1	32.631	0.05225
10	0.6	0.3	-1	1	0.03	0.04	2	0.9	10	1	29.313	0.03608
10	0.5	0.3	-1	1	0.03	0.04	1.6	0.6	10	1	31.094	0.04167
10	0.3	0.2	-1	1	0.03	0.04	2	0.1	10	1	32.185	0.05065
10	0.5	0.2	-1	1	0.03	0.04	2	0.2	10	1	30.53	0.04067
10	0.4	0.2	-1	1	0.03	0.04	2	0.1	10	1	31.6	0.04555
10	0.7	0.2	-1	1	0.03	0.04	2	0.5	10	1	28.716	0.03873
10	0.3	0.2	-1	1	0.03	0.04	2	0.2	10	1	31.851	0.0489
10	0.1	0.2	-1	1	0.03	0.04	2	0.2	10	1	33.14	0.0572
10	0.4	0.3	-1	1	0.03	0.04	2	0.9	10	1	29.251	0.036
10	0.2	0.3	-1	1	0.03	0.04	2	0.8	10	1	29.777	0.03512
10	0.5	0.3	-1	1	0.03	0.04	2	0.9	10	1	29.249	0.03524
10	0.1	0.4	-1	1	0.03	0.04	1.6	0.9	10	1	29.136	0.02607
10	0.3	0.3	-1	1	0.03	0.04	2	0.6	10	1	31.082	0.03866
10	0.6	0.1	-1	1	0.03	0.04	2	0	10	1	29.464	0.04215
10	0.1	0.3	-1	1	0.03	0.04	2	0.8	10	1	29.899	0.03315
10	0.1	0.3	-1	1	0.03	0.04	2	0.9	10	1	29.235	0.03024
10	0.1	0.3	-1	1	0.03	0.04	2	0.6	10	1	31.036	0.04197
10	0.7	0.2	-1	1	0.03	0.04	2	0.1	10	1	28.839	0.0318
10	0.2	0.4	-1	1	0.03	0.04	1.2	0.8	10	1	30.414	0.03361
10	0.2	0.2	-1	1	0.03	0.04	2	0.3	10	1	32.266	0.05055
10	0.4	0.2	-1	1	0.03	0.04	2	0.2	10	1	31.248	0.04422
10	0.1	0.2	-1	1	0.03	0.04	2	0.4	10	1	32.042	0.05027
10	0.1	0.4	-1	1	0.03	0.04	1.2	0.8	10	1	29.957	0.02822
10	0.9	0.2	-1	1	0.03	0.04	2	0.3	10	1	27.067	0.0257
10	0.3	0.1	-1	1	0.03	0.04	2	0	10	1	32.749	0.05581
10	0.6	0.2	-1	1	0.03	0.04	2	0.3	10	1	29.881	0.03778
10	0.2	0.3	-1	1	0.03	0.04	2	0.9	10	1	29.229	0.03256
10	0.5	0.2	-1	1	0.03	0.04	2	0.3	10	1	30.422	0.04178
10	0.4	0.4	-1	1	0.03	0.04	0.8	0.7	10	1	33.875	0.0483
10	0.4	0.4	-1	1	0.03	0.04	1.6	0.8	10	1	31.004	0.03506
10	0.5	0.3	-1	1	0.03	0.04	2	0.7	10	1	29.93	0.03621
10	0.4	0.2	-1	1	0.03	0.04	2	0.5	10	1	30.067	0.04298
10	0.2	0.2	-1	1	0.03	0.04	2	0.5	10	1	31.256	0.04529
10	0.4	0.1	-1	1	0.03	0.04	2	0	10	1	31.53	0.05109
10	0.01	0.3	-1	1	0.03	0.04	2	0.8	10	1	30.514	0.0309
10	0.1	0.2	-1	1	0.03	0.04	2	0.3	10	1	32.731	0.05373
10	0.01	0.3	-1	1	0.03	0.04	2	0.6	10	1	31.755	0.04238
10	0.01	0.2	-1	1	0.03	0.04	2	0.2	10	1	34.523	0.06457
10	0.4	0.2	-1	1	0.03	0.04	2	0.3	10	1	31.212	0.04376
10	0.3	0.2	-1	1	0.03	0.04	2	0.3	10	1	31.733	0.04795
10	0.5	0.4	-1	1	0.03	0.04	1.2	0.9	10	1	32.151	0.04164
10	0.3	0.2	-1	1	0.03	0.04	1.6	0.3	10	1	32.241	0.05166
10	0.3	0.2	-1	1	0.03	0.04	2	0.5	10	1	30.954	0.04553
10	0.9	0.9	-1	1	0.03	0.04	0.2	0.9	10	1	135.24	0.0954
10	0.01	0.3	-1	1	0.03	0.04	2	0.9	10	1	29.575	0.0254
10	0.01	0.2	-1	1	0.03	0.04	2	0.5	10	1	32.539	0.05015
10	0.1	0.1	-1	1	0.03	0.04	2	0	10	1	34.548	0.06758
10	0.2	0.2	-1	1	0.03	0.04	2	0.1	10	1	32.998	0.05419
10	0.2	0.1	-1	1	0.03	0.04	2	0	10	1	33.665	0.06179
10	0.9	0.99	-1	1	0.03	0.04	0.04	0.7	10	1	239.3	0.09173
10	0.2	0.2	-1	1	0.03	0.04	1.2	0.2	10	1	34.42	0.0634
10	0.2	0.3	-1	1	0.03	0.04	1.6	0.6	10	1	31.406	0.04197
10	0.01	0.1	-1	1	0.03	0.04	1.6	0	10	1	37.135	0.0828
10	0.2	0.3	-1	1	0.03	0.04	2	0.6	10	1	31.014	0.04065
10	0.9	0.9	-1	1	0.03	0.04	0.2	0.8	10	1	134.78	0.09373
10	0.01	0.1	-1	1	0.03	0.04	2	0	10	1	36.183	0.07817
10	0.9	0.99	-1	1	0.03	0.04	0.04	0.5	10	1	242.96	0.10147
10	0.9	0.99	-1	1	0.03	0.04	0.04	0.9	10	1	238.32	0.08261
10	0.9	0.99	-1	1	0.03	0.04	0.04	0.6	10	1	243.46	0.09848
10	0.01	0.2	-1	1	0.03	0.04	2	0.4	10	1	33.417	0.0556
10	0.9	0.99	-1	1	0.03	0.04	0.04	0.3	10	1	247.24	0.10954
10	0.99	0.9	-1	1	0.03	0.04	0.2	0.9	10	1	231.55	0.12194
10	0.9	0.99	-1	1	0.03	0.04	0.04	0.8	10	1	237.9	0.08658
10	0.99	0.99	-1	1	0.03	0.04	0.04	0.7	10	1	1335.1	0.12124
10	0.99	0.99	-1	1	0.03	0.04	0.04	0.5	10	1	1333.1	0.12156
10	0.99	0.99	-1	1	0.03	0.04	0.04	0.2	10	1	1337.4	0.12064
10	0.99	0.99	-1	1	0.03	0.04	0.04	0.6	10	1	1335.3	0.11962
10	0.99	0.99	-1	1	0.03	0.04	0.04	0.4	10	1	1328.1	0.12025
10	0.99	0.99	-1	1	0.03	0.04	0.04	0.9	10	1	1330.6	0.12017
10	0.99	0.99	-1	1	0.03	0.04	0.04	0.8	10	1	1323.8	0.11957
10	0.99	0.99	-1	1	0.03	0.04	0.04	0.3	10	1	1333.5	0.11877
10	0.8	0.99	-1	1	0.03	0.04	0.04	0.8	10	1	122.54	0.06486
10	0.3	0.8	-1	1	0.03	0.04	0.2	0.6	10	1	35.233	0.04144
10	0.8	0.5	-1	1	0.03	0.04	0.8	0.8	10	1	40.2	0.05732
10	0.1	0.4	-1	1	0.03	0.04	1.2	0.7	10	1	30.931	0.03544
10	0.8	0.4	-1	1	0.03	0.04	1.2	0.9	10	1	33.637	0.04762
10	0.8	0.2	-1	1	0.03	0.04	2	0.5	10	1	27.866	0.03383
10	0.8	0.3	-1	1	0.03	0.04	0.4	0.2	10	1	39.265	0.0826
10	0.4	0.2	-1	1	0.03	0.04	0.4	0.1	10	1	38.514	0.08854
10	0.1	0.6	-1	1	0.03	0.04	0.4	0.7	10	1	29.52	0.02565
10	0.1	0.3	-1	1	0.03	0.04	0.4	0.2	10	1	37.417	0.07963
10	0.01	0.4	-1	1	0.03	0.04	0.4	0.3	10	1	34.962	0.06516
10	0.4	0.3	-1	1	0.03	0.04	0.4	0.2	10	1	38.749	0.08126
10	0.99	0.2	-1	1	0.03	0.04	0.4	0	10	1	35.175	0.06241
10	0.9	0.2	-1	1	0.03	0.04	0.4	0	10	1	36.313	0.06866
10	0.01	0.6	-1	1	0.03	0.04	0.4	0.9	10	1	23.384	0.00175
10	0.99	0.4	-1	1	0.03	0.04	0.4	0.4	10	1	43.634	0.09144
10	0.1	0.6	-1	1	0.03	0.04	0.4	0.8	10	1	28.235	0.01652
10	0.5	0.4	-1	1	0.03	0.04	0.4	0.3	10	1	39.777	0.07816
10	0.99	0.3	-1	1	0.03	0.04	0.4	0.2	10	1	38.958	0.07913
10	0.4	0.6	-1	1	0.03	0.04	0.4	0.9	10	1	34.546	0.03401
10	0.8	0.2	-1	1	0.03	0.04	0.4	0.1	10	1	36.978	0.07981
10	0.99	0.4	-1	1	0.03	0.04	0.4	0.3	10	1	43.169	0.07936
10	0.9	0.3	-1	1	0.03	0.04	0.4	0.2	10	1	39.112	0.08021
10	0.9	0.2	-1	1	0.03	0.04	0.4	0.1	10	1	36.29	0.07634
10	0.01	0.6	-1	1	0.03	0.04	0.4	0.7	10	1	26.73	0.01293
10	0.8	0.6	-1	1	0.03	0.04	0.4	0.8	10	1	50.115	0.08354
20	0.2	0.6	-1	1	0.03	0.04	0.4	0.6	10	1	68.321	0.00374
10	0.99	0.2	-1	1	0.03	0.04	0.4	0.1	10	1	35.512	0.07702
10	0.2	0.6	-1	1	0.03	0.04	0.4	0.9	10	1	29.454	0.0168
10	0.99	0.5	-1	1	0.03	0.04	0.4	0.5	10	1	50.038	0.09305
10	0.01	0.6	-1	1	0.03	0.04	0.4	0.8	10	1	25.008	0.00602
10	0.9	0.4	-1	1	0.03	0.04	0.4	0.4	10	1	42.755	0.0887
10	0.7	0.6	-1	1	0.03	0.04	0.4	0.9	10	1	45.115	0.06872
20	0.3	0.6	-1	1	0.03	0.04	0.4	0.6	10	1	74.161	0.00611
10	0.9	0.5	-1	1	0.03	0.04	0.4	0.6	10	1	47.491	0.09348
10	0.5	0.3	-1	1	0.03	0.04	0.4	0.2	10	1	39.015	0.08244
10	0.9	0.4	-1	1	0.03	0.04	0.4	0.3	10	1	43.004	0.08112
10	0.7	0.3	-1	1	0.03	0.04	0.4	0.2	10	1	39.069	0.08135
10	0.8	0.2	-1	1	0.03	0.04	0.4	0	10	1	36.751	0.07371
10	0.8	0.4	-1	1	0.03	0.04	0.4	0.3	10	1	42.398	0.08077
10	0.01	0.5	-1	1	0.03	0.04	0.4	0.6	10	1	29.49	0.02602
10	0.99	0.5	-1	1	0.03	0.04	0.4	0.6	10	1	49.986	0.10035
10	0.3	0.2	-1	1	0.03	0.04	0.4	0	10	1	39.244	0.09103
10	0.1	0.6	-1	1	0.03	0.04	0.4	0.9	10	1	26.88	0.0096
10	0.1	0.5	-1	1	0.03	0.04	0.4	0.6	10	1	32.136	0.03866
10	0.7	0.2	-1	1	0.03	0.04	0.4	0	10	1	37.285	0.07668
10	0.01	0.5	-1	1	0.03	0.04	0.4	0.5	10	1	30.943	0.03661
10	0.7	0.5	-1	1	0.03	0.04	0.4	0.6	10	1	43.045	0.07923
10	0.9	0.6	-1	1	0.03	0.04	0.4	0.9	10	1	54.956	0.10196
10	0.2	0.6	-1	1	0.03	0.04	0.4	0.7	10	1	31.891	0.03228
10	0.7	0.4	-1	1	0.03	0.04	0.4	0.3	10	1	41.595	0.07884
10	0.2	0.2	-1	1	0.03	0.04	0.4	0	10	1	39.424	0.09131
10	0.8	0.5	-1	1	0.03	0.04	0.4	0.6	10	1	45.702	0.08586
10	0.2	0.6	-1	1	0.03	0.04	0.4	0.8	10	1	30.65	0.02343
10	0.6	0.2	-1	1	0.03	0.04	0.4	0.1	10	1	38.002	0.08481
10	0.1	0.5	-1	1	0.03	0.04	0.4	0.5	10	1	33.248	0.04982
10	0.2	0.5	-1	1	0.03	0.04	0.4	0.6	10	1	33.682	0.04568
10	0.3	0.6	-1	1	0.03	0.04	0.4	0.7	10	1	34.037	0.04049
10	0.6	0.3	-1	1	0.03	0.04	0.4	0.2	10	1	39.341	0.08184
10	0.5	0.2	-1	1	0.03	0.04	0.4	0.1	10	1	38.283	0.08575
10	0.4	0.4	-1	1	0.03	0.04	0.4	0.3	10	1	38.637	0.07441
10	0.2	0.4	-1	1	0.03	0.04	0.4	0.3	10	1	36.981	0.07299
10	0.6	0.4	-1	1	0.03	0.04	0.4	0.3	10	1	40.483	0.07866
10	0.8	0.4	-1	1	0.03	0.04	0.4	0.4	10	1	42.084	0.08519
10	0.3	0.4	-1	1	0.03	0.04	0.4	0.3	10	1	38.079	0.07599
10	0.3	0.6	-1	1	0.03	0.04	0.4	0.8	10	1	33.114	0.03274
10	0.1	0.4	-1	1	0.03	0.04	0.4	0.3	10	1	35.825	0.07023
10	0.2	0.5	-1	1	0.03	0.04	0.4	0.5	10	1	34.568	0.05439
10	0.7	0.4	-1	1	0.03	0.04	0.4	0.4	10	1	41.366	0.08241
10	0.9	0.5	-1	1	0.03	0.04	0.4	0.5	10	1	48.087	0.08828
10	0.1	0.4	-1	1	0.03	0.04	0.4	0.4	10	1	34.806	0.06161
10	0.3	0.5	-1	1	0.03	0.04	0.4	0.6	10	1	35.273	0.05197
10	0.2	0.3	-1	1	0.03	0.04	0.4	0.2	10	1	37.833	0.08276
10	0.3	0.5	-1	1	0.03	0.04	0.4	0.5	10	1	35.956	0.05931
10	0.6	0.5	-1	1	0.03	0.04	0.4	0.6	10	1	41.34	0.072
10	0.4	0.5	-1	1	0.03	0.04	0.4	0.6	10	1	36.875	0.05777
10	0.2	0.4	-1	1	0.03	0.04	0.4	0.4	10	1	35.849	0.06481
10	0.3	0.3	-1	1	0.03	0.04	0.4	0.2	10	1	38.363	0.0816
10	0.7	0.2	-1	1	0.03	0.04	0.4	0.1	10	1	37.565	0.08306
10	0.6	0.4	-1	1	0.03	0.04	0.4	0.4	10	1	39.939	0.07788
20	0.2	0.4	-1	1	0.03	0.04	0.4	0.2	10	1	88.106	0.02511
10	0.4	0.6	-1	1	0.03	0.04	0.4	0.7	10	1	36.502	0.04607
10	0.5	0.5	-1	1	0.03	0.04	0.4	0.6	10	1	39.152	0.06462
10	0.5	0.4	-1	1	0.03	0.04	0.4	0.4	10	1	39.094	0.0755
10	0.9	0.6	-1	1	0.03	0.04	0.4	0.7	10	1	55.659	0.09231
10	0.6	0.2	-1	1	0.03	0.04	0.4	0	10	1	38.092	0.08327
10	0.5	0.6	-1	1	0.03	0.04	0.4	0.9	10	1	37.907	0.04534
10	0.3	0.2	-1	1	0.03	0.04	0.4	0.1	10	1	38.915	0.09058
10	0.01	0.4	-1	1	0.03	0.04	0.4	0.4	10	1	33.633	0.05322
10	0.2	0.2	-1	1	0.03	0.04	0.4	0.1	10	1	38.747	0.08955
10	0.4	0.6	-1	1	0.03	0.04	0.4	0.8	10	1	35.796	0.04068
10	0.8	0.5	-1	1	0.03	0.04	0.4	0.5	10	1	45.793	0.08145
10	0.5	0.6	-1	1	0.03	0.04	0.4	0.7	10	1	39.361	0.05378
10	0.5	0.6	-1	1	0.03	0.04	0.4	0.8	10	1	38.56	0.0501
10	0.5	0.2	-1	1	0.03	0.04	0.4	0	10	1	38.629	0.08498
10	0.9	0.6	-1	1	0.03	0.04	0.4	0.8	10	1	55.319	0.09659
10	0.6	0.5	-1	1	0.03	0.04	0.4	0.5	10	1	41.657	0.07281
10	0.7	0.5	-1	1	0.03	0.04	0.4	0.5	10	1	43.612	0.07696
10	0.4	0.4	-1	1	0.03	0.04	0.4	0.4	10	1	38.174	0.07397
10	0.3	0.4	-1	1	0.03	0.04	0.4	0.4	10	1	36.968	0.06918
10	0.6	0.6	-1	1	0.03	0.04	0.4	0.7	10	1	42.835	0.0631
10	0.99	0.6	-1	1	0.03	0.04	0.4	0.8	10	1	59.823	0.10977
10	0.99	0.6	-1	1	0.03	0.04	0.4	0.7	10	1	60.008	0.10057
10	0.7	0.6	-1	1	0.03	0.04	0.4	0.7	10	1	46.765	0.07169
10	0.6	0.6	-1	1	0.03	0.04	0.4	0.8	10	1	42.258	0.05847
10	0.99	0.6	-1	1	0.03	0.04	0.4	0.9	10	1	59.28	0.11688
10	0.8	0.6	-1	1	0.03	0.04	0.4	0.7	10	1	50.637	0.07991
40	0.01	0.6	-1	1	0.03	0.04	0.4	0.8	10	1	96.11	0
10	0.3	0.6	-1	1	0.03	0.04	0.4	0.9	10	1	32.058	0.02524
10	0.8	0.6	-1	1	0.03	0.04	0.4	0.9	10	1	49.574	0.08446
20	0.5	0.3	-1	1	0.03	0.04	0.4	0.1	10	1	94.386	0.02856
10	0.01	0.3	-1	1	0.03	0.04	0.4	0.2	10	1	37.371	0.08079
20	0.01	0.6	-1	1	0.03	0.04	0.4	0.8	10	1	49.047	2.00E-05
10	0.4	0.2	-1	1	0.03	0.04	0.4	0	10	1	38.975	0.08767
10	0.6	0.6	-1	1	0.03	0.04	0.4	0.9	10	1	41.09	0.05674
20	0.9	0.6	-1	1	0.03	0.04	0.4	0.6	10	1	129.67	0.02749
10	0.1	0.2	-1	1	0.03	0.04	0.4	0	10	1	39.605	0.09649
20	0.9	0.4	-1	1	0.03	0.04	0.4	0.3	10	1	101.16	0.02596
20	0.1	0.6	-1	1	0.03	0.04	0.4	0.8	10	1	55.223	0.00028
10	0.4	0.5	-1	1	0.03	0.04	0.4	0.5	10	1	38.085	0.06306
10	0.5	0.5	-1	1	0.03	0.04	0.4	0.5	10	1	39.547	0.06774
20	0.01	0.6	-1	1	0.03	0.04	0.4	0.9	10	1	46.095	0
20	0.6	0.6	-1	1	0.03	0.04	0.4	0.6	10	1	96.075	0.01379
10	0.01	0.2	-1	1	0.03	0.04	0.4	0	10	1	39.98	0.10032
20	0.1	0.6	-1	1	0.03	0.04	0.4	0.9	10	1	52.144	3.00E-05
20	0.7	0.6	-1	1	0.03	0.04	0.4	0.6	10	1	106.62	0.01786
20	0.01	0.6	-1	1	0.03	0.04	0.4	0.7	10	1	52.769	0.00023
40	0.1	0.6	-1	1	0.03	0.04	0.4	0.7	10	1	113.38	0
30	0.01	0.5	-1	1	0.03	0.04	0.4	0.4	10	1	102.47	0.0011
20	0.01	0.6	-1	1	0.03	0.04	0.4	0.6	10	1	56.62	0.00087
20	0.8	0.3	-1	1	0.03	0.04	0.4	0.1	10	1	91.791	0.024
10	0.1	0.2	-1	1	0.03	0.04	0.4	0.1	10	1	38.508	0.08918
20	0.99	0.6	-1	1	0.03	0.04	0.4	0.6	10	1	142.84	0.03454
20	0.1	0.6	-1	1	0.03	0.04	0.4	0.7	10	1	58.918	0.00094
20	0.2	0.6	-1	1	0.03	0.04	0.4	0.8	10	1	60.973	0.00073
10	0.01	0.2	-1	1	0.03	0.04	0.4	0.1	10	1	39.04	0.09212
20	0.9	0.3	-1	1	0.03	0.04	0.4	0.1	10	1	91.387	0.02168
30	0.1	0.5	-1	1	0.03	0.04	0.4	0.4	10	1	109.77	0.00211
20	0.99	0.6	-1	1	0.03	0.04	0.4	0.8	10	1	144.11	0.04525
20	0.1	0.6	-1	1	0.03	0.04	0.4	0.6	10	1	62.897	0.00236
20	0.2	0.6	-1	1	0.03	0.04	0.4	0.9	10	1	57.056	0.00032
20	0.3	0.6	-1	1	0.03	0.04	0.4	0.8	10	1	66.435	0.00166
20	0.2	0.6	-1	1	0.03	0.04	0.4	0.7	10	1	63.732	0.00192
30	0.5	0.6	-1	1	0.03	0.04	0.4	0.7	10	1	123.59	0.00154
40	0.3	0.6	-1	1	0.03	0.04	0.4	0.8	10	1	127.55	0
40	0.2	0.6	-1	1	0.03	0.04	0.4	0.7	10	1	123.4	0
20	0.3	0.6	-1	1	0.03	0.04	0.4	0.9	10	1	63.323	0.00065
20	0.3	0.6	-1	1	0.03	0.04	0.4	0.7	10	1	70.444	0.00349
30	0.4	0.5	-1	1	0.03	0.04	0.4	0.4	10	1	128.88	0.00476
20	0.9	0.5	-1	1	0.03	0.04	0.4	0.4	10	1	113.11	0.02714
20	0.9	0.2	-1	1	0.03	0.04	0.4	0	10	1	83.465	0.01862
20	0.99	0.6	-1	1	0.03	0.04	0.4	0.7	10	1	144.25	0.03953
50	0.01	0.6	-1	1	0.03	0.04	0.4	0.7	10	1	129.14	0
40	0.3	0.6	-1	1	0.03	0.04	0.4	0.7	10	1	134.1	3.00E-05
20	0.4	0.6	-1	1	0.03	0.04	0.4	0.7	10	1	76.463	0.00519
20	0.01	0.5	-1	1	0.03	0.04	0.4	0.5	10	1	64.064	0.00302
30	0.01	0.6	-1	1	0.03	0.04	0.4	0.8	10	1	72.12	0
20	0.4	0.6	-1	1	0.03	0.04	0.4	0.9	10	1	69.816	0.00187
20	0.6	0.2	-1	1	0.03	0.04	0.4	0	10	1	91.676	0.02859
20	0.4	0.6	-1	1	0.03	0.04	0.4	0.8	10	1	72.797	0.00333
30	0.6	0.6	-1	1	0.03	0.04	0.4	0.7	10	1	136.71	0.00244
30	0.8	0.4	-1	1	0.03	0.04	0.4	0.2	10	1	151.22	0.00927
20	0.5	0.6	-1	1	0.03	0.04	0.4	0.8	10	1	81.021	0.00615
20	0.99	0.4	-1	1	0.03	0.04	0.4	0.3	10	1	102.66	0.0267
20	0.1	0.5	-1	1	0.03	0.04	0.4	0.5	10	1	69.714	0.00604
20	0.5	0.6	-1	1	0.03	0.04	0.4	0.9	10	1	78.851	0.00433
30	0.01	0.6	-1	1	0.03	0.04	0.4	0.9	10	1	68.779	0
20	0.2	0.5	-1	1	0.03	0.04	0.4	0.5	10	1	74.149	0.00888
20	0.99	0.4	-1	1	0.03	0.04	0.4	0.2	10	1	99.97	0.02012
30	0.9	0.3	-1	1	0.03	0.04	0.4	0.1	10	1	140.32	0.00818
20	0.4	0.6	-1	1	0.03	0.04	0.4	0.6	10	1	80.411	0.00777
50	0.3	0.6	-1	1	0.03	0.04	0.4	0.9	10	1	152.03	0
20	0.99	0.5	-1	1	0.03	0.04	0.4	0.5	10	1	118.65	0.03359
20	0.01	0.5	-1	1	0.03	0.04	0.4	0.4	10	1	70.789	0.00773
20	0.5	0.6	-1	1	0.03	0.04	0.4	0.6	10	1	87.539	0.01057
20	0.99	0.3	-1	1	0.03	0.04	0.4	0.1	10	1	89.582	0.01836
20	0.5	0.6	-1	1	0.03	0.04	0.4	0.7	10	1	84.256	0.00782
30	0.1	0.6	-1	1	0.03	0.04	0.4	0.8	10	1	82.238	1.00E-05
20	0.6	0.6	-1	1	0.03	0.04	0.4	0.8	10	1	90.583	0.00951
20	0.9	0.4	-1	1	0.03	0.04	0.4	0.2	10	1	100.09	0.0221
30	0.1	0.6	-1	1	0.03	0.04	0.4	0.9	10	1	77.157	0
40	0.01	0.4	-1	1	0.03	0.04	0.4	0.4	10	1	138.17	0.00027
30	0.01	0.6	-1	1	0.03	0.04	0.4	0.7	10	1	77.801	0
50	0.1	0.6	-1	1	0.03	0.04	0.4	0.7	10	1	141.65	0
20	0.6	0.6	-1	1	0.03	0.04	0.4	0.7	10	1	93.536	0.01179
20	0.1	0.5	-1	1	0.03	0.04	0.4	0.4	10	1	75.105	0.01092
30	0.1	0.6	-1	1	0.03	0.04	0.4	0.7	10	1	85.475	3.00E-05
50	0.2	0.6	-1	1	0.03	0.04	0.4	0.7	10	1	151.96	0
20	0.3	0.5	-1	1	0.03	0.04	0.4	0.5	10	1	78.077	0.00995
20	0.7	0.6	-1	1	0.03	0.04	0.4	0.8	10	1	100.8	0.01534
20	0.8	0.4	-1	1	0.03	0.04	0.4	0.3	10	1	99.215	0.0265
20	0.8	0.6	-1	1	0.03	0.04	0.4	0.6	10	1	115.64	0.02134
20	0.2	0.5	-1	1	0.03	0.04	0.4	0.4	10	1	78.524	0.01295
20	0.4	0.5	-1	1	0.03	0.04	0.4	0.5	10	1	83.356	0.01324
20	0.8	0.2	-1	1	0.03	0.04	0.4	0	10	1	86.447	0.02209
20	0.99	0.6	-1	1	0.03	0.04	0.4	0.9	10	1	144.99	0.05268
20	0.99	0.5	-1	1	0.03	0.04	0.4	0.4	10	1	116.69	0.02755
20	0.6	0.6	-1	1	0.03	0.04	0.4	0.9	10	1	87.54	0.00814
30	0.01	0.4	-1	1	0.03	0.04	0.4	0.3	10	1	117.3	0.00406
20	0.5	0.5	-1	1	0.03	0.04	0.4	0.4	10	1	91.117	0.01783
20	0.99	0.2	-1	1	0.03	0.04	0.4	0	10	1	81.443	0.01568
40	0.1	0.4	-1	1	0.03	0.04	0.4	0.4	10	1	146.94	0.00069
20	0.7	0.5	-1	1	0.03	0.04	0.4	0.4	10	1	101.61	0.02183
20	0.6	0.4	-1	1	0.03	0.04	0.4	0.2	10	1	96.004	0.02469
20	0.8	0.4	-1	1	0.03	0.04	0.4	0.2	10	1	98.661	0.02339
20	0.9	0.5	-1	1	0.03	0.04	0.4	0.5	10	1	112.87	0.02993
20	0.6	0.5	-1	1	0.03	0.04	0.4	0.4	10	1	97.041	0.0204
20	0.3	0.4	-1	1	0.03	0.04	0.4	0.2	10	1	90.597	0.02522
20	0.3	0.4	-1	1	0.03	0.04	0.4	0.3	10	1	85.461	0.02032
20	0.7	0.4	-1	1	0.03	0.04	0.4	0.2	10	1	97.179	0.02431
20	0.2	0.4	-1	1	0.03	0.04	0.4	0.3	10	1	84.287	0.01921
20	0.1	0.4	-1	1	0.03	0.04	0.4	0.3	10	1	80.967	0.01717
20	0.01	0.4	-1	1	0.03	0.04	0.4	0.3	10	1	79.33	0.01535
20	0.7	0.5	-1	1	0.03	0.04	0.4	0.5	10	1	99.771	0.02154
20	0.8	0.5	-1	1	0.03	0.04	0.4	0.4	10	1	106.5	0.02391
20	0.5	0.4	-1	1	0.03	0.04	0.4	0.3	10	1	92.538	0.02214
30	0.2	0.6	-1	1	0.03	0.04	0.4	0.8	10	1	88.845	2.00E-05
20	0.4	0.4	-1	1	0.03	0.04	0.4	0.3	10	1	88.306	0.02082
20	0.4	0.3	-1	1	0.03	0.04	0.4	0.1	10	1	93.26	0.02974
20	0.7	0.6	-1	1	0.03	0.04	0.4	0.9	10	1	99.858	0.01454
30	0.9	0.6	-1	1	0.03	0.04	0.4	0.8	10	1	200.25	0.01532
20	0.8	0.5	-1	1	0.03	0.04	0.4	0.5	10	1	106.11	0.02565
20	0.6	0.5	-1	1	0.03	0.04	0.4	0.5	10	1	92.822	0.01819
20	0.5	0.5	-1	1	0.03	0.04	0.4	0.5	10	1	88.429	0.01632
20	0.9	0.6	-1	1	0.03	0.04	0.4	0.7	10	1	129.46	0.03057
20	0.7	0.6	-1	1	0.03	0.04	0.4	0.7	10	1	101.77	0.01695
30	0.2	0.6	-1	1	0.03	0.04	0.4	0.9	10	1	83.59	0
20	0.7	0.2	-1	1	0.03	0.04	0.4	0	10	1	89.282	0.02589
40	0.01	0.6	-1	1	0.03	0.04	0.4	0.9	10	1	91.758	0
20	0.8	0.6	-1	1	0.03	0.04	0.4	0.8	10	1	114.37	0.02318
20	0.5	0.2	-1	1	0.03	0.04	0.4	0	10	1	93.019	0.03087
30	0.3	0.6	-1	1	0.03	0.04	0.4	0.8	10	1	96.308	0.00013
20	0.8	0.6	-1	1	0.03	0.04	0.4	0.7	10	1	116.09	0.02303
50	0.4	0.6	-1	1	0.03	0.04	0.4	0.9	10	1	166.03	0
30	0.3	0.6	-1	1	0.03	0.04	0.4	0.9	10	1	92.529	1.00E-05
20	0.7	0.4	-1	1	0.03	0.04	0.4	0.3	10	1	95.849	0.02528
20	0.1	0.4	-1	1	0.03	0.04	0.4	0.2	10	1	86.358	0.02436
20	0.6	0.4	-1	1	0.03	0.04	0.4	0.3	10	1	93.11	0.02371
50	0.3	0.6	-1	1	0.03	0.04	0.4	0.7	10	1	167.01	0
20	0.01	0.4	-1	1	0.03	0.04	0.4	0.2	10	1	84.662	0.0236
20	0.9	0.6	-1	1	0.03	0.04	0.4	0.8	10	1	129.15	0.03356
20	0.8	0.6	-1	1	0.03	0.04	0.4	0.9	10	1	113.74	0.02387
20	0.7	0.3	-1	1	0.03	0.04	0.4	0.1	10	1	92.96	0.02588
40	0.7	0.6	-1	1	0.03	0.04	0.4	0.9	10	1	192.07	0.00098
20	0.6	0.3	-1	1	0.03	0.04	0.4	0.1	10	1	92.8	0.02639
20	0.4	0.4	-1	1	0.03	0.04	0.4	0.2	10	1	91.529	0.02547
40	0.1	0.6	-1	1	0.03	0.04	0.4	0.9	10	1	102.32	0
50	0.1	0.5	-1	1	0.03	0.04	0.4	0.6	10	1	153.22	0
20	0.5	0.4	-1	1	0.03	0.04	0.4	0.2	10	1	94.55	0.02582
20	0.9	0.6	-1	1	0.03	0.04	0.4	0.9	10	1	129.97	0.03689
50	0.01	0.5	-1	1	0.03	0.04	0.4	0.5	10	1	152.99	0
40	0.6	0.5	-1	1	0.03	0.04	0.4	0.5	10	1	182.86	0.00198
30	0.2	0.6	-1	1	0.03	0.04	0.4	0.7	10	1	93.517	9.00E-05
30	0.2	0.5	-1	1	0.03	0.04	0.4	0.6	10	1	102.05	0.0005
30	0.99	0.5	-1	1	0.03	0.04	0.4	0.4	10	1	182.96	0.01201
20	0.4	0.2	-1	1	0.03	0.04	0.4	0	10	1	92.744	0.03195
40	0.2	0.4	-1	1	0.03	0.04	0.4	0.4	10	1	153.36	0.00086
30	0.3	0.6	-1	1	0.03	0.04	0.4	0.7	10	1	101.59	0.00024
30	0.4	0.6	-1	1	0.03	0.04	0.4	0.9	10	1	102.92	0.00016
50	0.2	0.5	-1	1	0.03	0.04	0.4	0.6	10	1	164.56	3.00E-05
30	0.1	0.5	-1	1	0.03	0.04	0.4	0.5	10	1	102.18	0.00085
20	0.2	0.3	-1	1	0.03	0.04	0.4	0.1	10	1	91.674	0.03154
40	0.5	0.4	-1	1	0.03	0.04	0.4	0.4	10	1	175.83	0.00258
20	0.3	0.3	-1	1	0.03	0.04	0.4	0.1	10	1	93.307	0.03047
30	0.01	0.5	-1	1	0.03	0.04	0.4	0.5	10	1	94.64	0.00032
30	0.2	0.5	-1	1	0.03	0.04	0.4	0.5	10	1	108.17	0.00123
40	0.3	0.4	-1	1	0.03	0.04	0.4	0.4	10	1	159.52	0.00138
20	0.3	0.2	-1	1	0.03	0.04	0.4	0	10	1	94.579	0.03486
30	0.5	0.6	-1	1	0.03	0.04	0.4	0.9	10	1	114.03	0.0004
30	0.3	0.5	-1	1	0.03	0.04	0.4	0.6	10	1	107.54	0.0011
40	0.01	0.6	-1	1	0.03	0.04	0.4	0.7	10	1	103.98	0
30	0.8	0.6	-1	1	0.03	0.04	0.4	0.8	10	1	171.53	0.00794
40	0.99	0.4	-1	1	0.03	0.04	0.4	0.4	10	1	219.06	0.00812
40	0.1	0.6	-1	1	0.03	0.04	0.4	0.8	10	1	107.85	0
20	0.2	0.2	-1	1	0.03	0.04	0.4	0	10	1	95.277	0.03689
30	0.4	0.5	-1	1	0.03	0.04	0.4	0.6	10	1	116.13	0.00187
20	0.1	0.3	-1	1	0.03	0.04	0.4	0.1	10	1	92.171	0.03234
30	0.99	0.3	-1	1	0.03	0.04	0.4	0.1	10	1	136.85	0.00631
20	0.3	0.5	-1	1	0.03	0.04	0.4	0.4	10	1	82.518	0.01434
30	0.5	0.6	-1	1	0.03	0.04	0.4	0.8	10	1	119.24	0.00076
30	0.99	0.2	-1	1	0.03	0.04	0.4	0	10	1	125.36	0.0048
20	0.4	0.5	-1	1	0.03	0.04	0.4	0.4	10	1	86.618	0.01597
40	0.2	0.6	-1	1	0.03	0.04	0.4	0.8	10	1	117.75	0
30	0.9	0.2	-1	1	0.03	0.04	0.4	0	10	1	127.94	0.00656
40	0.2	0.6	-1	1	0.03	0.04	0.4	0.9	10	1	111.46	0
30	0.3	0.5	-1	1	0.03	0.04	0.4	0.5	10	1	114.4	0.00202
20	0.01	0.3	-1	1	0.03	0.04	0.4	0.1	10	1	93.509	0.03506
30	0.99	0.4	-1	1	0.03	0.04	0.4	0.3	10	1	158.16	0.01144
30	0.7	0.4	-1	1	0.03	0.04	0.4	0.2	10	1	149.01	0.00994
20	0.1	0.2	-1	1	0.03	0.04	0.4	0	10	1	96.961	0.04037
40	0.8	0.6	-1	1	0.03	0.04	0.4	0.8	10	1	228.86	0.00356
30	0.7	0.6	-1	1	0.03	0.04	0.4	0.8	10	1	151.66	0.00428
50	0.2	0.5	-1	1	0.03	0.04	0.4	0.5	10	1	175.33	4.00E-05
30	0.9	0.6	-1	1	0.03	0.04	0.4	0.9	10	1	199.75	0.01648
40	0.3	0.6	-1	1	0.03	0.04	0.4	0.9	10	1	120.59	0
30	0.99	0.6	-1	1	0.03	0.04	0.4	0.9	10	1	228.53	0.02875
30	0.4	0.5	-1	1	0.03	0.04	0.4	0.5	10	1	123.49	0.003
30	0.6	0.6	-1	1	0.03	0.04	0.4	0.9	10	1	128.98	0.0012
30	0.9	0.4	-1	1	0.03	0.04	0.4	0.2	10	1	152.79	0.00849
20	0.01	0.2	-1	1	0.03	0.04	0.4	0	10	1	99.253	0.04527
30	0.6	0.6	-1	1	0.03	0.04	0.4	0.8	10	1	132.63	0.00173
50	0.01	0.5	-1	1	0.03	0.04	0.4	0.6	10	1	142.28	0
30	0.3	0.4	-1	1	0.03	0.04	0.4	0.2	10	1	138.57	0.00988
40	0.9	0.5	-1	1	0.03	0.04	0.4	0.5	10	1	233.28	0.0062
40	0.9	0.6	-1	1	0.03	0.04	0.4	0.9	10	1	269.25	0.00948
30	0.99	0.4	-1	1	0.03	0.04	0.4	0.2	10	1	153.89	0.00773
30	0.2	0.5	-1	1	0.03	0.04	0.4	0.4	10	1	115.96	0.0031
30	0.3	0.5	-1	1	0.03	0.04	0.4	0.4	10	1	122.33	0.00357
50	0.01	0.6	-1	1	0.03	0.04	0.4	0.9	10	1	115.22	0
30	0.5	0.5	-1	1	0.03	0.04	0.4	0.6	10	1	126.59	0.00331
30	0.99	0.5	-1	1	0.03	0.04	0.4	0.6	10	1	188.74	0.02074
30	0.9	0.5	-1	1	0.03	0.04	0.4	0.5	10	1	173.46	0.01297
30	0.7	0.2	-1	1	0.03	0.04	0.4	0	10	1	138.62	0.0111
30	0.9	0.5	-1	1	0.03	0.04	0.4	0.6	10	1	174.44	0.01544
30	0.01	0.5	-1	1	0.03	0.04	0.4	0.6	10	1	87.026	2.00E-05
30	0.6	0.5	-1	1	0.03	0.04	0.4	0.6	10	1	137.12	0.00522
40	0.01	0.5	-1	1	0.03	0.04	0.4	0.6	10	1	115.15	1.00E-05
40	0.9	0.2	-1	1	0.03	0.04	0.4	0	10	1	171.55	0.00278
30	0.1	0.5	-1	1	0.03	0.04	0.4	0.6	10	1	94.64	0.00019
30	0.8	0.2	-1	1	0.03	0.04	0.4	0	10	1	132.88	0.00898
30	0.5	0.2	-1	1	0.03	0.04	0.4	0	10	1	145.63	0.01442
30	0.5	0.5	-1	1	0.03	0.04	0.4	0.5	10	1	130.92	0.00427
40	0.1	0.5	-1	1	0.03	0.04	0.4	0.6	10	1	125.46	2.00E-05
40	0.4	0.6	-1	1	0.03	0.04	0.4	0.9	10	1	135.44	0
30	0.7	0.5	-1	1	0.03	0.04	0.4	0.6	10	1	148.95	0.00788
40	0.3	0.3	-1	1	0.03	0.04	0.4	0.2	10	1	181.71	0.005
30	0.6	0.5	-1	1	0.03	0.04	0.4	0.5	10	1	140.4	0.0058
30	0.99	0.6	-1	1	0.03	0.04	0.4	0.8	10	1	229.34	0.02494
30	0.5	0.5	-1	1	0.03	0.04	0.4	0.4	10	1	137.71	0.00573
30	0.8	0.5	-1	1	0.03	0.04	0.4	0.6	10	1	159.62	0.01054
40	0.2	0.5	-1	1	0.03	0.04	0.4	0.6	10	1	132.31	5.00E-05
50	0.1	0.6	-1	1	0.03	0.04	0.4	0.9	10	1	127.86	0
30	0.4	0.4	-1	1	0.03	0.04	0.4	0.3	10	1	133.51	0.00723
30	0.6	0.5	-1	1	0.03	0.04	0.4	0.4	10	1	145.67	0.00673
50	0.1	0.5	-1	1	0.03	0.04	0.4	0.5	10	1	165.18	1.00E-05
40	0.4	0.6	-1	1	0.03	0.04	0.4	0.8	10	1	139.95	2.00E-05
30	0.8	0.3	-1	1	0.03	0.04	0.4	0.1	10	1	142.32	0.00928
30	0.1	0.4	-1	1	0.03	0.04	0.4	0.3	10	1	121.68	0.00542
30	0.5	0.4	-1	1	0.03	0.04	0.4	0.3	10	1	139.94	0.00841
40	0.3	0.5	-1	1	0.03	0.04	0.4	0.6	10	1	141.31	0.00018
50	0.8	0.5	-1	1	0.03	0.04	0.4	0.5	10	1	267.57	0.00225
30	0.7	0.3	-1	1	0.03	0.04	0.4	0.1	10	1	142.09	0.0111
30	0.3	0.4	-1	1	0.03	0.04	0.4	0.3	10	1	130.4	0.00707
40	0.01	0.5	-1	1	0.03	0.04	0.4	0.5	10	1	124.91	3.00E-05
30	0.6	0.2	-1	1	0.03	0.04	0.4	0	10	1	141.81	0.01305
30	0.7	0.5	-1	1	0.03	0.04	0.4	0.5	10	1	151.54	0.00764
50	0.2	0.6	-1	1	0.03	0.04	0.4	0.9	10	1	138.74	0
30	0.2	0.4	-1	1	0.03	0.04	0.4	0.3	10	1	125.76	0.00627
30	0.7	0.5	-1	1	0.03	0.04	0.4	0.4	10	1	154.24	0.00809
40	0.1	0.5	-1	1	0.03	0.04	0.4	0.5	10	1	132.41	0.00016
30	0.2	0.4	-1	1	0.03	0.04	0.4	0.2	10	1	133.5	0.00944
30	0.9	0.4	-1	1	0.03	0.04	0.4	0.3	10	1	156.69	0.01094
50	0.01	0.4	-1	1	0.03	0.04	0.4	0.4	10	1	172.1	6.00E-05
30	0.8	0.4	-1	1	0.03	0.04	0.4	0.3	10	1	152.45	0.01062
30	0.8	0.5	-1	1	0.03	0.04	0.4	0.5	10	1	162.73	0.01075
40	0.5	0.6	-1	1	0.03	0.04	0.4	0.8	10	1	154.72	0.0002
40	0.4	0.6	-1	1	0.03	0.04	0.4	0.7	10	1	146.04	0.00011
30	0.3	0.3	-1	1	0.03	0.04	0.4	0.1	10	1	145.16	0.01459
30	0.4	0.6	-1	1	0.03	0.04	0.4	0.8	10	1	107.53	0.00041
30	0.4	0.6	-1	1	0.03	0.04	0.4	0.7	10	1	112.6	0.0007
30	0.6	0.4	-1	1	0.03	0.04	0.4	0.3	10	1	141.89	0.00886
30	0.1	0.4	-1	1	0.03	0.04	0.4	0.2	10	1	133.43	0.00974
30	0.7	0.4	-1	1	0.03	0.04	0.4	0.3	10	1	147.47	0.01015
40	0.1	0.2	-1	1	0.03	0.04	0.4	0.1	10	1	194.07	0.00898
50	0.01	0.6	-1	1	0.03	0.04	0.4	0.8	10	1	121.41	0
30	0.1	0.3	-1	1	0.03	0.04	0.4	0.1	10	1	143.93	0.01542
30	0.8	0.6	-1	1	0.03	0.04	0.4	0.7	10	1	175.41	0.00744
30	0.8	0.5	-1	1	0.03	0.04	0.4	0.4	10	1	163.71	0.00987
30	0.9	0.5	-1	1	0.03	0.04	0.4	0.4	10	1	173.46	0.01178
30	0.99	0.5	-1	1	0.03	0.04	0.4	0.5	10	1	185.45	0.01565
30	0.4	0.4	-1	1	0.03	0.04	0.4	0.2	10	1	141.87	0.01013
40	0.5	0.6	-1	1	0.03	0.04	0.4	0.7	10	1	162.19	0.00033
30	0.01	0.4	-1	1	0.03	0.04	0.4	0.2	10	1	131.56	0.00893
40	0.5	0.6	-1	1	0.03	0.04	0.4	0.9	10	1	149.65	5.00E-05
40	0.99	0.6	-1	1	0.03	0.04	0.4	0.7	10	1	303.05	0.01146
30	0.6	0.3	-1	1	0.03	0.04	0.4	0.1	10	1	145.07	0.01151
30	0.9	0.6	-1	1	0.03	0.04	0.4	0.7	10	1	198.45	0.0133
30	0.7	0.6	-1	1	0.03	0.04	0.4	0.7	10	1	154.69	0.00457
40	0.2	0.5	-1	1	0.03	0.04	0.4	0.5	10	1	141.08	0.00033
30	0.6	0.4	-1	1	0.03	0.04	0.4	0.2	10	1	146.63	0.01019
50	0.1	0.6	-1	1	0.03	0.04	0.4	0.8	10	1	134.1	0
30	0.5	0.4	-1	1	0.03	0.04	0.4	0.2	10	1	143.4	0.0098
30	0.5	0.3	-1	1	0.03	0.04	0.4	0.1	10	1	144.38	0.01249
40	0.01	0.2	-1	1	0.03	0.04	0.4	0.1	10	1	200.17	0.00906
40	0.3	0.5	-1	1	0.03	0.04	0.4	0.5	10	1	149.86	0.00052
50	0.5	0.2	-1	1	0.03	0.04	0.4	0	10	1	242.99	0.00403
40	0.6	0.6	-1	1	0.03	0.04	0.4	0.8	10	1	173.11	0.00031
50	0.8	0.5	-1	1	0.03	0.04	0.4	0.6	10	1	262.56	0.00246
40	0.4	0.5	-1	1	0.03	0.04	0.4	0.6	10	1	152.01	0.00041
50	0.99	0.4	-1	1	0.03	0.04	0.4	0.4	10	1	271.46	0.00467
40	0.6	0.6	-1	1	0.03	0.04	0.4	0.7	10	1	178.97	0.00074
50	0.6	0.4	-1	1	0.03	0.04	0.4	0.4	10	1	227.03	0.00146
50	0.8	0.6	-1	1	0.03	0.04	0.4	0.7	10	1	286.46	0.00132
40	0.8	0.3	-1	1	0.03	0.04	0.4	0.2	10	1	189.6	0.0055
40	0.99	0.2	-1	1	0.03	0.04	0.4	0	10	1	165.71	0.00176
40	0.5	0.5	-1	1	0.03	0.04	0.4	0.6	10	1	164.02	0.00072
30	0.2	0.3	-1	1	0.03	0.04	0.4	0.1	10	1	144.1	0.01512
40	0.7	0.6	-1	1	0.03	0.04	0.4	0.8	10	1	198	0.00119
40	0.9	0.4	-1	1	0.03	0.04	0.4	0.3	10	1	207.99	0.00557
40	0.9	0.6	-1	1	0.03	0.04	0.4	0.7	10	1	267.85	0.00673
50	0.2	0.6	-1	1	0.03	0.04	0.4	0.8	10	1	145.96	0
50	0.3	0.2	-1	1	0.03	0.04	0.4	0.1	10	1	239.99	0.00457
40	0.9	0.6	-1	1	0.03	0.04	0.4	0.8	10	1	268.62	0.00837
40	0.7	0.6	-1	1	0.03	0.04	0.4	0.7	10	1	203	0.00153
40	0.99	0.3	-1	1	0.03	0.04	0.4	0.2	10	1	187.56	0.00435
40	0.99	0.2	-1	1	0.03	0.04	0.4	0.1	10	1	172.89	0.00386
50	0.8	0.3	-1	1	0.03	0.04	0.4	0.2	10	1	233.15	0.00253
30	0.99	0.6	-1	1	0.03	0.04	0.4	0.7	10	1	225.71	0.02068
40	0.4	0.5	-1	1	0.03	0.04	0.4	0.5	10	1	161.25	0.00092
50	0.3	0.6	-1	1	0.03	0.04	0.4	0.8	10	1	159.25	0
30	0.7	0.6	-1	1	0.03	0.04	0.4	0.9	10	1	148.19	0.00382
40	0.8	0.6	-1	1	0.03	0.04	0.4	0.7	10	1	231.46	0.00318
40	0.5	0.5	-1	1	0.03	0.04	0.4	0.5	10	1	171.55	0.00125
30	0.4	0.3	-1	1	0.03	0.04	0.4	0.1	10	1	144.09	0.01358
50	0.9	0.5	-1	1	0.03	0.04	0.4	0.6	10	1	289.43	0.0042
40	0.8	0.4	-1	1	0.03	0.04	0.4	0.3	10	1	200.58	0.00457
30	0.8	0.6	-1	1	0.03	0.04	0.4	0.9	10	1	174.01	0.00911
40	0.99	0.6	-1	1	0.03	0.04	0.4	0.9	10	1	315.97	0.01832
50	0.5	0.3	-1	1	0.03	0.04	0.4	0.2	10	1	229.62	0.00252
40	0.99	0.4	-1	1	0.03	0.04	0.4	0.3	10	1	210.13	0.00547
40	0.4	0.4	-1	1	0.03	0.04	0.4	0.4	10	1	169.53	0.0021
50	0.9	0.6	-1	1	0.03	0.04	0.4	0.9	10	1	336.21	0.00494
30	0.4	0.2	-1	1	0.03	0.04	0.4	0	10	1	148.26	0.01695
40	0.9	0.2	-1	1	0.03	0.04	0.4	0.1	10	1	174.2	0.0044
40	0.7	0.5	-1	1	0.03	0.04	0.4	0.5	10	1	198.4	0.00344
30	0.3	0.2	-1	1	0.03	0.04	0.4	0	10	1	149.58	0.01789
50	0.5	0.6	-1	1	0.03	0.04	0.4	0.9	10	1	185.54	0
40	0.9	0.5	-1	1	0.03	0.04	0.4	0.6	10	1	234.3	0.00791
50	0.99	0.5	-1	1	0.03	0.04	0.4	0.6	10	1	321.35	0.00766
50	0.6	0.2	-1	1	0.03	0.04	0.4	0.1	10	1	232.1	0.00368
50	0.99	0.6	-1	1	0.03	0.04	0.4	0.7	10	1	384.95	0.00728
40	0.99	0.5	-1	1	0.03	0.04	0.4	0.6	10	1	254.1	0.01177
50	0.4	0.6	-1	1	0.03	0.04	0.4	0.7	10	1	180.69	1.00E-05
40	0.8	0.5	-1	1	0.03	0.04	0.4	0.5	10	1	213.15	0.00477
30	0.01	0.3	-1	1	0.03	0.04	0.4	0.1	10	1	148.92	0.01709
50	0.01	0.3	-1	1	0.03	0.04	0.4	0.2	10	1	217.5	0.00145
50	0.4	0.6	-1	1	0.03	0.04	0.4	0.8	10	1	172.44	0
50	0.8	0.6	-1	1	0.03	0.04	0.4	0.8	10	1	282.8	0.00125
40	0.6	0.4	-1	1	0.03	0.04	0.4	0.4	10	1	182.46	0.00327
50	0.5	0.6	-1	1	0.03	0.04	0.4	0.7	10	1	198.12	3.00E-05
40	0.4	0.3	-1	1	0.03	0.04	0.4	0.2	10	1	182.72	0.00512
50	0.1	0.4	-1	1	0.03	0.04	0.4	0.4	10	1	179.73	0.00017
40	0.7	0.4	-1	1	0.03	0.04	0.4	0.4	10	1	188.11	0.00417
40	0.6	0.5	-1	1	0.03	0.04	0.4	0.6	10	1	178.41	0.00163
40	0.5	0.3	-1	1	0.03	0.04	0.4	0.2	10	1	186.64	0.00559
40	0.7	0.5	-1	1	0.03	0.04	0.4	0.6	10	1	193.02	0.00301
50	0.5	0.6	-1	1	0.03	0.04	0.4	0.8	10	1	193.07	0
40	0.99	0.5	-1	1	0.03	0.04	0.4	0.5	10	1	249.38	0.00839
50	0.2	0.4	-1	1	0.03	0.04	0.4	0.4	10	1	188.23	0.00023
50	0.3	0.5	-1	1	0.03	0.04	0.4	0.6	10	1	174.77	3.00E-05
50	0.9	0.6	-1	1	0.03	0.04	0.4	0.8	10	1	331.9	0.0038
40	0.9	0.4	-1	1	0.03	0.04	0.4	0.4	10	1	208.67	0.00666
50	0.99	0.3	-1	1	0.03	0.04	0.4	0.2	10	1	232.3	0.00205
50	0.3	0.4	-1	1	0.03	0.04	0.4	0.4	10	1	195.92	0.00051
30	0.2	0.2	-1	1	0.03	0.04	0.4	0	10	1	151.88	0.02029
40	0.8	0.4	-1	1	0.03	0.04	0.4	0.4	10	1	201.93	0.00524
40	0.8	0.6	-1	1	0.03	0.04	0.4	0.9	10	1	227.13	0.00331
50	0.01	0.2	-1	1	0.03	0.04	0.4	0.1	10	1	251.38	0.00583
40	0.1	0.4	-1	1	0.03	0.04	0.4	0.3	10	1	160.39	0.00178
40	0.8	0.5	-1	1	0.03	0.04	0.4	0.6	10	1	213.25	0.00472
50	0.01	0.4	-1	1	0.03	0.04	0.4	0.3	10	1	189.22	0.00031
40	0.9	0.3	-1	1	0.03	0.04	0.4	0.2	10	1	190.64	0.00543
30	0.1	0.2	-1	1	0.03	0.04	0.4	0	10	1	154.77	0.02177
50	0.99	0.2	-1	1	0.03	0.04	0.4	0	10	1	204.36	0.0005
40	0.6	0.6	-1	1	0.03	0.04	0.4	0.9	10	1	169.5	0.00031
40	0.2	0.4	-1	1	0.03	0.04	0.4	0.3	10	1	165.92	0.00231
50	0.6	0.6	-1	1	0.03	0.04	0.4	0.7	10	1	220.72	0.00017
40	0.8	0.2	-1	1	0.03	0.04	0.4	0.1	10	1	179.31	0.00547
50	0.6	0.6	-1	1	0.03	0.04	0.4	0.9	10	1	209.09	5.00E-05
50	0.8	0.6	-1	1	0.03	0.04	0.4	0.9	10	1	281.78	0.00164
50	0.6	0.3	-1	1	0.03	0.04	0.4	0.2	10	1	229.91	0.00266
40	0.7	0.3	-1	1	0.03	0.04	0.4	0.2	10	1	188.32	0.00529
50	0.4	0.2	-1	1	0.03	0.04	0.4	0	10	1	251.06	0.00545
40	0.4	0.4	-1	1	0.03	0.04	0.4	0.3	10	1	176.48	0.00305
50	0.9	0.2	-1	1	0.03	0.04	0.4	0	10	1	212.07	0.00123
40	0.3	0.4	-1	1	0.03	0.04	0.4	0.3	10	1	171.9	0.00276
40	0.6	0.3	-1	1	0.03	0.04	0.4	0.2	10	1	188.5	0.0056
40	0.7	0.2	-1	1	0.03	0.04	0.4	0.1	10	1	182.55	0.00618
30	0.01	0.2	-1	1	0.03	0.04	0.4	0	10	1	162.84	0.02673
40	0.5	0.4	-1	1	0.03	0.04	0.4	0.3	10	1	182.69	0.00386
50	0.4	0.4	-1	1	0.03	0.04	0.4	0.4	10	1	204.92	0.00073
50	0.4	0.5	-1	1	0.03	0.04	0.4	0.6	10	1	187.4	8.00E-05
40	0.01	0.4	-1	1	0.03	0.04	0.4	0.3	10	1	154	0.00106
40	0.7	0.2	-1	1	0.03	0.04	0.4	0	10	1	183.94	0.00557
50	0.7	0.6	-1	1	0.03	0.04	0.4	0.7	10	1	248.52	0.00055
50	0.99	0.2	-1	1	0.03	0.04	0.4	0.1	10	1	213.33	0.00167
40	0.7	0.4	-1	1	0.03	0.04	0.4	0.3	10	1	195.38	0.00389
50	0.9	0.4	-1	1	0.03	0.04	0.4	0.4	10	1	260.44	0.0038
50	0.5	0.4	-1	1	0.03	0.04	0.4	0.4	10	1	214.23	0.00097
40	0.6	0.4	-1	1	0.03	0.04	0.4	0.3	10	1	189.86	0.0042
40	0.8	0.2	-1	1	0.03	0.04	0.4	0	10	1	177.11	0.00417
50	0.5	0.5	-1	1	0.03	0.04	0.4	0.6	10	1	203.24	0.00022
50	0.8	0.4	-1	1	0.03	0.04	0.4	0.4	10	1	249.01	0.00241
50	0.7	0.4	-1	1	0.03	0.04	0.4	0.4	10	1	240.57	0.00198
50	0.9	0.4	-1	1	0.03	0.04	0.4	0.3	10	1	254.48	0.00252
50	0.9	0.2	-1	1	0.03	0.04	0.4	0.1	10	1	218.99	0.00223
40	0.99	0.6	-1	1	0.03	0.04	0.4	0.8	10	1	309.93	0.01413
50	0.99	0.6	-1	1	0.03	0.04	0.4	0.9	10	1	401.23	0.01262
50	0.6	0.6	-1	1	0.03	0.04	0.4	0.8	10	1	216.94	7.00E-05
50	0.3	0.5	-1	1	0.03	0.04	0.4	0.5	10	1	184.18	9.00E-05
40	0.01	0.3	-1	1	0.03	0.04	0.4	0.2	10	1	177.43	0.00366
50	0.7	0.6	-1	1	0.03	0.04	0.4	0.9	10	1	238.72	0.00038
50	0.9	0.5	-1	1	0.03	0.04	0.4	0.5	10	1	287.48	0.0032
40	0.2	0.3	-1	1	0.03	0.04	0.4	0.2	10	1	178.78	0.00449
40	0.4	0.2	-1	1	0.03	0.04	0.4	0.1	10	1	189.35	0.00736
50	0.8	0.2	-1	1	0.03	0.04	0.4	0.1	10	1	222.83	0.0029
40	0.1	0.3	-1	1	0.03	0.04	0.4	0.2	10	1	178.84	0.00487
40	0.3	0.2	-1	1	0.03	0.04	0.4	0.1	10	1	190.14	0.00769
50	0.4	0.5	-1	1	0.03	0.04	0.4	0.5	10	1	196.95	0.0002
50	0.7	0.6	-1	1	0.03	0.04	0.4	0.8	10	1	241.79	0.00035
50	0.7	0.2	-1	1	0.03	0.04	0.4	0.1	10	1	227.92	0.00305
40	0.6	0.2	-1	1	0.03	0.04	0.4	0	10	1	189.06	0.00623
50	0.9	0.6	-1	1	0.03	0.04	0.4	0.7	10	1	331.21	0.00367
50	0.7	0.5	-1	1	0.03	0.04	0.4	0.5	10	1	244.33	0.00124
40	0.4	0.2	-1	1	0.03	0.04	0.4	0	10	1	196.63	0.00853
50	0.99	0.5	-1	1	0.03	0.04	0.4	0.5	10	1	311.76	0.00466
50	0.99	0.6	-1	1	0.03	0.04	0.4	0.8	10	1	388.91	0.00914
40	0.2	0.2	-1	1	0.03	0.04	0.4	0.1	10	1	195.36	0.00822
50	0.3	0.4	-1	1	0.03	0.04	0.4	0.3	10	1	211.74	0.00116
50	0.6	0.5	-1	1	0.03	0.04	0.4	0.6	10	1	220.5	0.00047
50	0.4	0.4	-1	1	0.03	0.04	0.4	0.3	10	1	216.05	0.00114
50	0.1	0.4	-1	1	0.03	0.04	0.4	0.3	10	1	198	0.00065
50	0.2	0.4	-1	1	0.03	0.04	0.4	0.3	10	1	201.61	0.00062
50	0.99	0.4	-1	1	0.03	0.04	0.4	0.3	10	1	261.07	0.00253
40	0.3	0.2	-1	1	0.03	0.04	0.4	0	10	1	204.98	0.0101
50	0.9	0.3	-1	1	0.03	0.04	0.4	0.2	10	1	234.86	0.00229
50	0.3	0.2	-1	1	0.03	0.04	0.4	0	10	1	255.18	0.00605
50	0.7	0.5	-1	1	0.03	0.04	0.4	0.6	10	1	238.86	0.00096
50	0.7	0.3	-1	1	0.03	0.04	0.4	0.2	10	1	232.53	0.00257
40	0.5	0.2	-1	1	0.03	0.04	0.4	0	10	1	193.06	0.00738
50	0.5	0.5	-1	1	0.03	0.04	0.4	0.5	10	1	213.63	0.00043
50	0.5	0.4	-1	1	0.03	0.04	0.4	0.3	10	1	224.24	0.00169
50	0.5	0.2	-1	1	0.03	0.04	0.4	0.1	10	1	232.49	0.00419
50	0.6	0.4	-1	1	0.03	0.04	0.4	0.3	10	1	233.26	0.00168
40	0.01	0.2	-1	1	0.03	0.04	0.4	0	10	1	222.9	0.01761
50	0.4	0.2	-1	1	0.03	0.04	0.4	0.1	10	1	235.54	0.00421
50	0.6	0.5	-1	1	0.03	0.04	0.4	0.5	10	1	228.63	0.00073
40	0.2	0.2	-1	1	0.03	0.04	0.4	0	10	1	209.08	0.01203
50	0.8	0.4	-1	1	0.03	0.04	0.4	0.3	10	1	245.56	0.00245
50	0.7	0.4	-1	1	0.03	0.04	0.4	0.3	10	1	242.09	0.00214
40	0.1	0.2	-1	1	0.03	0.04	0.4	0	10	1	212.39	0.01331
50	0.4	0.3	-1	1	0.03	0.04	0.4	0.2	10	1	225.51	0.0025
50	0.2	0.2	-1	1	0.03	0.04	0.4	0.1	10	1	240.43	0.00447
40	0.6	0.2	-1	1	0.03	0.04	0.4	0.1	10	1	185.29	0.00635
50	0.3	0.3	-1	1	0.03	0.04	0.4	0.2	10	1	224.42	0.00236
50	0.1	0.2	-1	1	0.03	0.04	0.4	0.1	10	1	241.31	0.00527
50	0.01	0.2	-1	1	0.03	0.04	0.4	0	10	1	286.14	0.0122
40	0.5	0.2	-1	1	0.03	0.04	0.4	0.1	10	1	188.68	0.00714
50	0.8	0.2	-1	1	0.03	0.04	0.4	0	10	1	222.86	0.00205
50	0.2	0.3	-1	1	0.03	0.04	0.4	0.2	10	1	220.25	0.0021
50	0.7	0.2	-1	1	0.03	0.04	0.4	0	10	1	224.93	0.00243
50	0.1	0.3	-1	1	0.03	0.04	0.4	0.2	10	1	221.22	0.00209
50	0.2	0.2	-1	1	0.03	0.04	0.4	0	10	1	260.29	0.00694
50	0.1	0.2	-1	1	0.03	0.04	0.4	0	10	1	270	0.00901
50	0.6	0.2	-1	1	0.03	0.04	0.4	0	10	1	234.22	0.00313
10	0.7	0.6	-1	1	0.03	0.04	0.4	0.8	10	1	45.462	0.06972
